# Supplementary material for: Use of tetrameric cubane aggregates of lithium aryloxides as secondary building units in controlling network assembly
Source: Royal Society of Chemistry journal article supplement (doi:10.1039/b413434f), 2004-12-02
Supplement: b413434f.pdf [file b413434f.pdf]

## SUPPLEMENTARY INFORMATION

### Use of tetrameric cubane aggregates of lithium aryloxides as secondary building units in controlling network assembly

Dugald J. MacDougall, J. Jacob Morris, Bruce C. Noll, Kenneth W. Henderson\*

*Department of Chemistry and Biochemistry, University of Notre Dame, Notre Dame, IN 46556.*

E-mail: khenders@nd.edu

#### General procedures

All experimental manipulations were performed under a dry nitrogen atmosphere in flame-dried glassware using standard Schlenk techniques. Dioxane was distilled from CaH<sub>2</sub> and stored over 4 Å molecular sieves prior to use. Hexane was dried by passage through columns of copper-based catalyst and alumina (Innovative Technology). BuLi was purchased from Aldrich as a 1.6 M solution in hexane and was standardized by titration against salicylaldehyde phenylhydrazone directly before use.<sup>1</sup> The phenols and 1-naphthol were purchased from Lancaster and dried by recrystallization from hexane or toluene prior to use.

#### NMR Spectroscopy

Spectra were obtained either on a Varian Unity Plus 300 MHz or on a Bruker AVANCE DPX-400 instrument. <sup>1</sup>H and <sup>13</sup>C spectra were referenced with respect to the residual solvent signal.

#### X-Ray Crystallography

Crystals were examined under Infineum V8512 oil. The datum crystal was affixed to a thin glass fiber mounted atop a tapered copper mounting-pin and transferred to the 100 K nitrogen stream of a Bruker APEX diffractometer equipped with an Oxford Cryosystems 700 series low-temperature apparatus. Cell parameters were determined using reflections harvested from three sets of 20 0.3°  $\omega$  scans. The orientation matrix derived from this was passed to COSMO<sup>2</sup> to determine the optimum data collection strategy. Cell parameters were refined using reflections with  $I \geq 10\sigma(I)$  harvested from the entire data collection. All data were corrected for Lorentz and polarization effects, as well as for absorption.

The structures were solved and refined using SHELXTL.<sup>3</sup> Structure solution was by direct methods. Non-hydrogen atoms not present in the direct methods solution were

---

<sup>1</sup> B. E. Love, E. G. Jones, *J. Org. Chem.* **1999**, *64*, 3755-3756.

<sup>2</sup> J. Kaercher, *COSMO*, Bruker-Nonius AXS, Inc., Madison, Wisconsin, USA, **2003**.

<sup>3</sup> G. M. Sheldrick, University of Göttingen.

located by successive cycles of full-matrix least-squares refinement on  $F^2$ . All non-hydrogen atoms were refined with parameters for anisotropic thermal motion. Hydrogen atoms were placed at idealized geometries and allowed to ride on the position of the parent atom. Hydrogen thermal parameters were set to 1.2× the equivalent isotropic U of the parent atom, 1.5× for methyl hydrogens. Details on individual refinements, including descriptions of disorder, can be found in the cif files CCDC 239838, 239840 and 239844, which can be obtained online free of charge (or from the Cambridge Crystallographic Data Centre, 12 Union Road, Cambridge CB2 1EZ, UK; fax: (+44) 1223-336-033; or deposit@ccdc.cam.ac.uk).

Phase identification was done with X-Ray powder diffraction performed on a D8 Bruker diffractometer (Cu  $K\alpha$ ,  $\lambda = 1.54178 \text{ \AA}$ ). The patterns were collected in steps of  $0.02^\circ$  ( $2\theta$ ) over the angular range  $4\text{--}60^\circ$  ( $2\theta$ ). Compound **1** used a step size of 0.02, with a step time of 20 s. Compounds **2** and **3** used a step size of 0.04, with a step time of 1 s. From the calculated crystal structures, determined by single crystal X-ray diffraction, pure powder diffraction patterns were derived using Powder Cell for Windows version 2.4.<sup>4</sup> The theoretical powder patterns were then compared to the actual powder patterns.

## Experimental Procedures

### Synthesis of [(PhOLi)<sub>4</sub>·3Dioxane]<sub>∞</sub>, **1**

BuLi (5 mmol, 3.2 mL) was added to a stirred solution of phenol (5 mmol, 470 mg) in dioxane (7.5 mL). A white precipitate rapidly formed, which dissolved on heating. Crystalline material was obtained by slowly cooling the hot solution in a warm water bath. The product was found to lose solvent on isolation to give a dioxane:phenoxide ratio of 0.5:1, as determined by <sup>1</sup>H NMR spectroscopy. Yield: 230 mg, 31.9 %.

<sup>1</sup>H NMR (300 MHz, DMSO-*d*<sub>6</sub>, 25 °C):  $\delta = 3.59$  (s, 4H, OCH<sub>2</sub>, dioxane), 6.29 (t, <sup>3</sup>*J*<sub>H,H</sub> = 8.1 Hz, 1H, *p*-H, Ph), 6.57 (d, <sup>3</sup>*J*<sub>H,H</sub> = 7.8 Hz, 2H, *o*-H, Ph), 6.95 (t, <sup>3</sup>*J*<sub>H,H</sub> = 7.5 Hz, 2H, *m*-H, Ph).

<sup>13</sup>C{<sup>1</sup>H} NMR (75 MHz, DMSO-*d*<sub>6</sub>, 25 °C):  $\delta = 66.46$  (OCH<sub>2</sub>, dioxane), 111.73 (*p*-C, Ph), 119.86 (*o*-C, Ph), 128.48 (*m*-C, Ph), 168.51 (*i*-C, Ph).

### Synthesis of [(4-Et-C<sub>6</sub>H<sub>4</sub>OLi)<sub>4</sub>·5/2Dioxane}·Dioxane]<sub>∞</sub>, **2**

BuLi (5 mmol, 3.2 mL) was added to a stirred solution of 4-isopropylphenol (5 mmol, 621 mg) in dioxane (5 mL). On the addition of hexane (12 mL) a white precipitate formed, which dissolved on heating. Crystalline material was obtained by slowly cooling the resulting solution in a hot water bath. The product was found to lose solvent on isolation to give a dioxane:aryloxide ratio of 0.57:1, as determined by <sup>1</sup>H NMR spectroscopy. Yield: 650 mg, 72.9 %.

---

<sup>4</sup> W. Kraus, G. Nolze, Federal Institute for Materials Research and Testing, Berlin, 2000.

$^1\text{H}$  NMR (300 MHz, DMSO- $d_6$ , 25 °C):  $\delta$  = 1.13 (t,  $^3J_{H,H}$  = 7.5 Hz, 3H, CH<sub>3</sub>, Et), 2.44 (d,  $^3J_{H,H}$  = 7.8 Hz, 2H, CH<sub>2</sub>, Et), 3.59 (s, 4.6H, OCH<sub>2</sub>, dioxane), 6.50 (d,  $^3J_{H,H}$  = 8.1 Hz, 2H, *o*-H, Ph), 6.79 (d,  $^3J_{H,H}$  = 8.1 Hz, 2H, *m*-H, Ph).

$^{13}\text{C}\{^1\text{H}\}$  NMR (75 MHz, DMSO- $d_6$ , 25 °C):  $\delta$  = 16.86 (CH<sub>3</sub>, Et), 27.70 (CH<sub>2</sub>, Et), 66.46 (OCH<sub>2</sub>, dioxane), 119.44 (*o*-C, Ph), 126.71 (*p*-C, Ph), 127.70 (*m*-C, Ph), 166.24 (*i*-C, Ph).

### Synthesis of $[\{(\text{C}_{10}\text{H}_7\text{OLi})_4 \cdot 2\text{Dioxane}\} \cdot 3\text{Dioxane}]_\infty$ , **3**

BuLi (5 mmol, 3.2 mL) was added to a stirred solution of 1-naphthol (5 mmol, 720 mg) in dioxane (5 mL). A white precipitate rapidly formed, which dissolved on dilution with dioxane (7 mL) and heating. Crystalline material was obtained by slowly cooling the resulting solution in a hot water bath. The product was found to lose solvent on isolation to give a dioxane:alkoxide ratio of 0.87:1, as determined by  $^1\text{H}$  NMR spectroscopy. Yield: 730 mg, 68.5 %.

$^1\text{H}$  NMR (300 MHz, DMSO- $d_6$ , 25 °C):  $\delta$  = 3.59 (s, 5.5H, OCH<sub>2</sub>, dioxane), 6.60 (d,  $^3J_{H,H}$  = 7.8 Hz, 1H, naphthyl-H), 6.69 (d,  $^3J_{H,H}$  = 7.8 Hz, 1H, naphthyl-H), 7.08 (t,  $^3J_{H,H}$  = 7.5 Hz, 1H, naphthy-H), 7.1 (t,  $^3J_{H,H}$  = 7.8 Hz, 1H, naphthy-H), 7.24 (t,  $^3J_{H,H}$  = 7.1 Hz, 1H, naphthy-H), 7.57 (d,  $^3J_{H,H}$  = 8.1 Hz, 1H, naphthy-H), 8.59 (d,  $^3J_{H,H}$  = 8.01 Hz, 1H, naphthy-H).

$^{13}\text{C}\{^1\text{H}\}$  NMR (75 MHz, DMSO- $d_6$ , 25 °C):  $\delta$  = 66.48 (OCH<sub>2</sub>, dioxane), 108.17, 110.51, 120.46, 124.36, 125.74, 126.48, 128.20, 130.24, 135.90, 167.14 (naphthyl).

**[(PhOLi)<sub>4</sub>·3Dioxane]<sub>∞</sub>, 1**

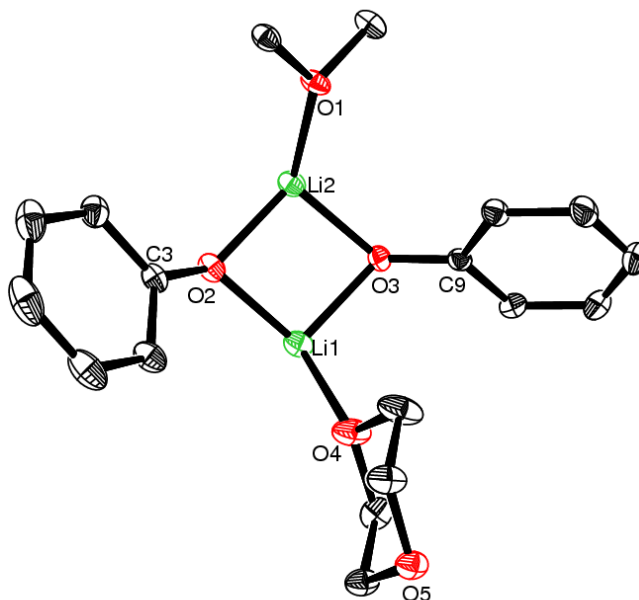

Table 1. Crystal data and structure refinement for **1**

|                                   |                                                                |                 |
|-----------------------------------|----------------------------------------------------------------|-----------------|
| Identification code               | bcn16m                                                         |                 |
| Empirical formula                 | C <sub>18</sub> H <sub>22</sub> Li <sub>2</sub> O <sub>5</sub> |                 |
| Formula weight                    | 332.24                                                         |                 |
| Temperature                       | 100(2) K                                                       |                 |
| Wavelength                        | 0.71073 Å                                                      |                 |
| Crystal system                    | Monoclinic                                                     |                 |
| Space group                       | C2/c                                                           |                 |
| Unit cell dimensions              | a = 13.0937(9) Å                                               | α = 90°.        |
|                                   | b = 17.7646(12) Å                                              | β = 94.853(4)°. |
|                                   | c = 15.7526(11) Å                                              | γ = 90°.        |
| Volume                            | 3651.0(4) Å <sup>3</sup>                                       |                 |
| Z                                 | 8                                                              |                 |
| Density (calculated)              | 1.209 Mg/m <sup>3</sup>                                        |                 |
| Absorption coefficient            | 0.085 mm <sup>-1</sup>                                         |                 |
| F(000)                            | 1408                                                           |                 |
| Crystal size                      | 0.36 x 0.22 x 0.17 mm <sup>3</sup>                             |                 |
| Crystal color and habit           | colorless block                                                |                 |
| Diffractometer                    | Bruker SMART APEX CCD area detector                            |                 |
| Theta range for data collection   | 1.94 to 33.00°                                                 |                 |
| Index ranges                      | -20 ≤ h ≤ 20, -27 ≤ k ≤ 24, -22 ≤ l ≤ 23                       |                 |
| Reflections collected             | 30134                                                          |                 |
| Independent reflections           | 6840 [R(int) = 0.0294]                                         |                 |
| Observed reflections (I > 2σ(I))  | 5889                                                           |                 |
| Completeness to theta = 33.00°    | 99.5 %                                                         |                 |
| Absorption correction             | Semi-empirical from equivalents                                |                 |
| Max. and min. transmission        | 0.9857 and 0.9701                                              |                 |
| Solution method                   | SHELXS-97 (Sheldrick, 1990)                                    |                 |
| Refinement method                 | SHELXL-97 (Sheldrick, 1997)                                    |                 |
| Data / restraints / parameters    | 6840 / 0 / 314                                                 |                 |
| Goodness-of-fit on F <sup>2</sup> | 1.098                                                          |                 |
| Final R indices [I > 2σ(I)]       | R1 = 0.0411, wR2 = 0.1170                                      |                 |

R indices (all data)  
Largest diff. peak and hole

R1 = 0.0475, wR2 = 0.1224  
0.498 and -0.229 e.Å<sup>-3</sup>

Table 2. Bond lengths [Å] and angles [°] for **1**.

|               |            |               |            |
|---------------|------------|---------------|------------|
| C(1)-O(1)     | 1.4402(8)  | C(1)-C(2)#1   | 1.5122(10) |
| C(1)-H(1A)    | 0.974(10)  | C(1)-H(1B)    | 0.966(12)  |
| C(2)-O(1)     | 1.4330(8)  | C(2)-C(1)#1   | 1.5122(9)  |
| C(2)-H(2A)    | 0.964(11)  | C(2)-H(2B)    | 0.960(12)  |
| C(3)-O(2)     | 1.3300(8)  | C(3)-C(4)     | 1.4085(10) |
| C(3)-C(8)     | 1.4087(10) | C(4)-C(5)     | 1.3959(12) |
| C(4)-H(4)     | 0.985(12)  | C(5)-C(6)     | 1.3892(15) |
| C(5)-H(5)     | 1.022(15)  | C(6)-C(7)     | 1.3838(15) |
| C(6)-H(6)     | 0.980(15)  | C(7)-C(8)     | 1.3912(11) |
| C(7)-H(7)     | 0.997(15)  | C(8)-H(8)     | 1.007(12)  |
| C(9)-O(3)     | 1.3305(8)  | C(9)-C(10)    | 1.4080(9)  |
| C(9)-C(14)    | 1.4099(10) | C(10)-C(11)   | 1.3935(10) |
| C(10)-H(10)   | 0.983(11)  | C(11)-C(12)   | 1.3889(13) |
| C(11)-H(11)   | 1.023(13)  | C(12)-C(13)   | 1.3883(13) |
| C(12)-H(12)   | 0.967(13)  | C(13)-C(14)   | 1.3947(11) |
| C(13)-H(13)   | 0.991(14)  | C(14)-H(14)   | 0.962(12)  |
| C(15)-O(4)    | 1.4403(10) | C(15)-C(16)   | 1.5058(11) |
| C(15)-H(15A)  | 0.984(14)  | C(15)-H(15B)  | 1.048(14)  |
| C(16)-O(5)    | 1.4205(10) | C(16)-H(16A)  | 1.006(12)  |
| C(16)-H(16B)  | 1.014(12)  | C(17)-O(5)    | 1.4293(9)  |
| C(17)-C(18)   | 1.5036(11) | C(17)-H(17A)  | 0.974(11)  |
| C(17)-H(17B)  | 1.002(14)  | C(18)-O(4)    | 1.4350(10) |
| C(18)-H(18A)  | 1.003(12)  | C(18)-H(18B)  | 1.004(13)  |
| Li(1)-O(4)    | 1.9079(13) | Li(1)-O(2)#2  | 1.9359(13) |
| Li(1)-O(3)    | 1.9522(14) | Li(1)-O(2)    | 1.9645(14) |
| Li(1)-Li(2)#2 | 2.5668(17) | Li(1)-Li(2)   | 2.5987(18) |
| Li(1)-Li(1)#2 | 2.639(3)   | Li(2)-O(2)    | 1.9269(13) |
| Li(2)-O(3)    | 1.9377(14) | Li(2)-O(1)    | 1.9403(13) |
| Li(2)-O(3)#2  | 1.9440(13) | Li(2)-Li(1)#2 | 2.5669(17) |
| Li(2)-Li(2)#2 | 2.673(2)   | O(2)-Li(1)#2  | 1.9358(13) |
| O(3)-Li(2)#2  | 1.9440(13) |               |            |

|                      |           |                       |           |
|----------------------|-----------|-----------------------|-----------|
| O(1)-C(1)-C(2)#1     | 110.37(5) | O(1)-C(1)-H(1A)       | 107.5(6)  |
| C(2)#1-C(1)-H(1A)    | 112.0(6)  | O(1)-C(1)-H(1B)       | 106.3(7)  |
| C(2)#1-C(1)-H(1B)    | 112.7(7)  | H(1A)-C(1)-H(1B)      | 107.7(9)  |
| O(1)-C(2)-C(1)#1     | 109.91(6) | O(1)-C(2)-H(2A)       | 107.1(7)  |
| C(1)#1-C(2)-H(2A)    | 111.5(7)  | O(1)-C(2)-H(2B)       | 106.1(7)  |
| C(1)#1-C(2)-H(2B)    | 109.5(7)  | H(2A)-C(2)-H(2B)      | 112.6(10) |
| O(2)-C(3)-C(4)       | 121.65(6) | O(2)-C(3)-C(8)        | 121.01(6) |
| C(4)-C(3)-C(8)       | 117.34(6) | C(5)-C(4)-C(3)        | 120.82(8) |
| C(5)-C(4)-H(4)       | 120.1(7)  | C(3)-C(4)-H(4)        | 119.0(7)  |
| C(6)-C(5)-C(4)       | 120.92(8) | C(6)-C(5)-H(5)        | 119.7(8)  |
| C(4)-C(5)-H(5)       | 119.3(8)  | C(7)-C(6)-C(5)        | 118.77(8) |
| C(7)-C(6)-H(6)       | 120.8(8)  | C(5)-C(6)-H(6)        | 120.4(8)  |
| C(6)-C(7)-C(8)       | 121.11(8) | C(6)-C(7)-H(7)        | 118.2(9)  |
| C(8)-C(7)-H(7)       | 120.7(9)  | C(7)-C(8)-C(3)        | 120.99(8) |
| C(7)-C(8)-H(8)       | 120.3(7)  | C(3)-C(8)-H(8)        | 118.7(7)  |
| O(3)-C(9)-C(10)      | 121.03(6) | O(3)-C(9)-C(14)       | 121.72(6) |
| C(10)-C(9)-C(14)     | 117.25(6) | C(11)-C(10)-C(9)      | 121.32(7) |
| C(11)-C(10)-H(10)    | 120.1(7)  | C(9)-C(10)-H(10)      | 118.6(7)  |
| C(12)-C(11)-C(10)    | 120.61(7) | C(12)-C(11)-H(11)     | 119.3(7)  |
| C(10)-C(11)-H(11)    | 120.1(7)  | C(13)-C(12)-C(11)     | 118.95(7) |
| C(13)-C(12)-H(12)    | 121.6(8)  | C(11)-C(12)-H(12)     | 119.4(8)  |
| C(12)-C(13)-C(14)    | 120.99(8) | C(12)-C(13)-H(13)     | 119.9(8)  |
| C(14)-C(13)-H(13)    | 119.0(8)  | C(13)-C(14)-C(9)      | 120.86(7) |
| C(13)-C(14)-H(14)    | 121.9(7)  | C(9)-C(14)-H(14)      | 117.2(7)  |
| O(4)-C(15)-C(16)     | 109.92(7) | O(4)-C(15)-H(15A)     | 106.5(9)  |
| C(16)-C(15)-H(15A)   | 109.2(8)  | O(4)-C(15)-H(15B)     | 107.8(8)  |
| C(16)-C(15)-H(15B)   | 110.6(8)  | H(15A)-C(15)-H(15B)   | 112.8(12) |
| O(5)-C(16)-C(15)     | 110.92(7) | O(5)-C(16)-H(16A)     | 108.1(7)  |
| C(15)-C(16)-H(16A)   | 110.1(7)  | O(5)-C(16)-H(16B)     | 107.4(7)  |
| C(15)-C(16)-H(16B)   | 110.4(7)  | H(16A)-C(16)-H(16B)   | 109.9(10) |
| O(5)-C(17)-C(18)     | 110.83(6) | O(5)-C(17)-H(17A)     | 110.0(7)  |
| C(18)-C(17)-H(17A)   | 109.5(7)  | O(5)-C(17)-H(17B)     | 108.8(8)  |
| C(18)-C(17)-H(17B)   | 107.4(8)  | H(17A)-C(17)-H(17B)   | 110.3(10) |
| O(4)-C(18)-C(17)     | 109.60(6) | O(4)-C(18)-H(18A)     | 107.4(7)  |
| C(17)-C(18)-H(18A)   | 111.5(7)  | O(4)-C(18)-H(18B)     | 107.7(7)  |
| C(17)-C(18)-H(18B)   | 111.6(7)  | H(18A)-C(18)-H(18B)   | 108.9(10) |
| O(4)-Li(1)-O(2)#2    | 129.52(7) | O(4)-Li(1)-O(3)       | 108.07(7) |
| O(2)#2-Li(1)-O(3)    | 96.81(6)  | O(4)-Li(1)-O(2)       | 125.25(7) |
| O(2)#2-Li(1)-O(2)    | 94.13(6)  | O(3)-Li(1)-O(2)       | 95.16(6)  |
| O(4)-Li(1)-Li(2)#2   | 137.33(7) | O(2)#2-Li(1)-Li(2)#2  | 48.21(4)  |
| O(3)-Li(1)-Li(2)#2   | 48.65(4)  | O(2)-Li(1)-Li(2)#2    | 95.11(6)  |
| O(4)-Li(1)-Li(2)     | 134.35(7) | O(2)#2-Li(1)-Li(2)    | 94.83(6)  |
| O(3)-Li(1)-Li(2)     | 47.84(4)  | O(2)-Li(1)-Li(2)      | 47.49(4)  |
| Li(2)#2-Li(1)-Li(2)  | 62.33(6)  | O(4)-Li(1)-Li(1)#2    | 159.45(5) |
| O(2)#2-Li(1)-Li(1)#2 | 47.87(4)  | O(3)-Li(1)-Li(1)#2    | 92.22(4)  |
| O(2)-Li(1)-Li(1)#2   | 46.96(4)  | Li(2)#2-Li(1)-Li(1)#2 | 59.87(5)  |
| Li(2)-Li(1)-Li(1)#2  | 58.68(5)  | O(2)-Li(2)-O(3)       | 96.86(6)  |
| O(2)-Li(2)-O(1)      | 122.81(7) | O(3)-Li(2)-O(1)       | 120.04(7) |
| O(2)-Li(2)-O(3)#2    | 97.37(6)  | O(3)-Li(2)-O(3)#2     | 91.98(6)  |
| O(1)-Li(2)-O(3)#2    | 120.94(7) | O(2)-Li(2)-Li(1)#2    | 48.50(4)  |
| O(3)-Li(2)-Li(1)#2   | 94.81(6)  | O(1)-Li(2)-Li(1)#2    | 145.02(7) |
| O(3)#2-Li(2)-Li(1)#2 | 48.93(4)  | O(2)-Li(2)-Li(1)      | 48.72(4)  |
| O(3)-Li(2)-Li(1)     | 48.32(4)  | O(1)-Li(2)-Li(1)      | 145.15(7) |
| O(3)#2-Li(2)-Li(1)   | 93.66(6)  | Li(1)#2-Li(2)-Li(1)   | 61.45(6)  |
| O(2)-Li(2)-Li(2)#2   | 92.71(4)  | O(3)-Li(2)-Li(2)#2    | 46.57(4)  |
| O(1)-Li(2)-Li(2)#2   | 144.47(4) | O(3)#2-Li(2)-Li(2)#2  | 46.37(4)  |

|                       |           |                     |           |
|-----------------------|-----------|---------------------|-----------|
| Li(1)#2-Li(2)-Li(2)#2 | 59.42(5)  | Li(1)-Li(2)-Li(2)#2 | 58.25(5)  |
| C(2)-O(1)-C(1)        | 110.46(5) | C(2)-O(1)-Li(2)     | 130.69(6) |
| C(1)-O(1)-Li(2)       | 114.85(6) | C(3)-O(2)-Li(2)     | 134.52(6) |
| C(3)-O(2)-Li(1)#2     | 124.69(6) | Li(2)-O(2)-Li(1)#2  | 83.29(6)  |
| C(3)-O(2)-Li(1)       | 128.62(6) | Li(2)-O(2)-Li(1)    | 83.79(6)  |
| Li(1)#2-O(2)-Li(1)    | 85.17(6)  | C(9)-O(3)-Li(2)     | 131.68(6) |
| C(9)-O(3)-Li(2)#2     | 128.22(6) | Li(2)-O(3)-Li(2)#2  | 87.06(6)  |
| C(9)-O(3)-Li(1)       | 127.08(6) | Li(2)-O(3)-Li(1)    | 83.84(6)  |
| Li(2)#2-O(3)-Li(1)    | 82.42(5)  | C(18)-O(4)-C(15)    | 110.18(6) |
| C(18)-O(4)-Li(1)      | 129.67(6) | C(15)-O(4)-Li(1)    | 117.09(6) |
| C(16)-O(5)-C(17)      | 110.17(5) |                     |           |

---

Symmetry transformations used to generate equivalent atoms:

#1 -x+1,-y+1,-z    #2 -x+1,y,-z+1/2

**$\{[(4\text{-Et-C}_6\text{H}_4\text{OLi})_4 \cdot 5/2\text{Dioxane}] \cdot \text{Dioxane}\}_\infty, 2$**

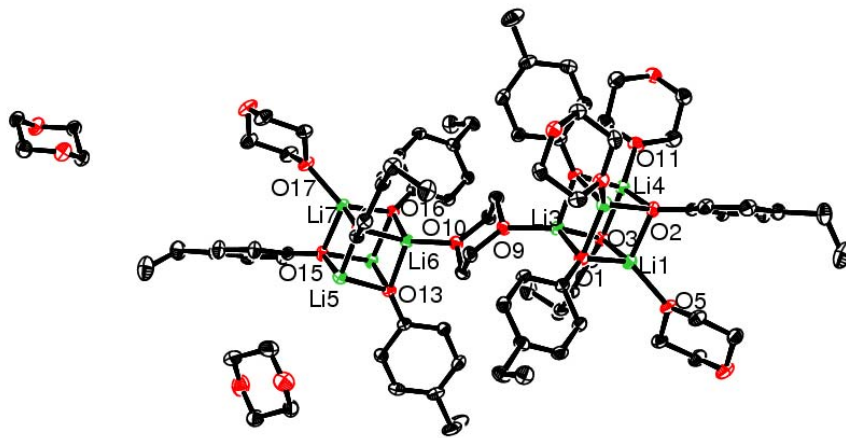

Table 3. Crystal data and structure refinement for **2**

|                                   |                                                                  |                            |
|-----------------------------------|------------------------------------------------------------------|----------------------------|
| Identification code               | lw1                                                              |                            |
| Empirical formula                 | C <sub>92</sub> H <sub>128</sub> Li <sub>8</sub> O <sub>22</sub> |                            |
| Formula weight                    | 1641.46                                                          |                            |
| Temperature                       | 100(2) K                                                         |                            |
| Wavelength                        | 0.71073 Å                                                        |                            |
| Crystal system                    | triclinic                                                        |                            |
| Space group                       | P-1                                                              |                            |
| Unit cell dimensions              | a = 14.3172(3) Å                                                 | $\alpha = 74.194(1)^\circ$ |
|                                   | b = 15.2696(3) Å                                                 | $\beta = 84.994(1)^\circ$  |
|                                   | c = 24.5935(6) Å                                                 | $\gamma = 62.507(1)^\circ$ |
| Volume                            | 4584.39(17) Å <sup>3</sup>                                       |                            |
| Z                                 | 2                                                                |                            |
| Density (calculated)              | 1.189 Mg/m <sup>3</sup>                                          |                            |
| Absorption coefficient            | 0.082 mm <sup>-1</sup>                                           |                            |
| F(000)                            | 1760                                                             |                            |
| Crystal size                      | 0.34 x 0.30 x 0.26 mm <sup>3</sup>                               |                            |
| Crystal color and habit           | clear colorless cube                                             |                            |
| Diffractometer                    | CCD area detector                                                |                            |
| Theta range for data collection   | 0.86 to 28.28°                                                   |                            |
| Index ranges                      | -19 ≤ h ≤ 19, -20 ≤ k ≤ 20, -32 ≤ l ≤ 31                         |                            |
| Reflections collected             | 91923                                                            |                            |
| Independent reflections           | 22586 [R(int) = 0.0389]                                          |                            |
| Observed reflections (I > 2σ(I))  | 16431                                                            |                            |
| Completeness to theta = 28.28°    | 99.2 %                                                           |                            |
| Absorption correction             | Semi-empirical from equivalents                                  |                            |
| Max. and min. transmission        | 0.9787 and 0.9726                                                |                            |
| Solution method                   | SHELXS-97 (Sheldrick, 1990)                                      |                            |
| Refinement method                 | SHELXL-97 (Sheldrick, 1997)                                      |                            |
| Data / restraints / parameters    | 22586 / 0 / 1107                                                 |                            |
| Goodness-of-fit on F <sup>2</sup> | 1.044                                                            |                            |



Final R indices [ $I > 2\sigma(I)$ ]  
R indices (all data)  
Largest diff. peak and hole

$R_1 = 0.0575$ ,  $wR_2 = 0.1584$   
 $R_1 = 0.0810$ ,  $wR_2 = 0.1782$   
 $0.982$  and  $-0.450$  e.Å<sup>-3</sup>

Table 4. Bond lengths [Å] and angles [°] for **2**.

|               |            |               |            |
|---------------|------------|---------------|------------|
| Li(1)-O(3)    | 1.943(3)   | Li(1)-O(1)    | 1.957(3)   |
| Li(1)-O(2)    | 1.967(3)   | Li(1)-O(5)    | 1.980(3)   |
| Li(2)-O(2)    | 1.920(3)   | Li(2)-O(7)    | 1.945(3)   |
| Li(2)-O(1)    | 1.958(3)   | Li(2)-O(4)    | 1.990(3)   |
| Li(3)-O(4)    | 1.908(3)   | Li(3)-O(9)    | 1.913(3)   |
| Li(3)-O(1)    | 1.927(3)   | Li(3)-O(3)    | 1.972(3)   |
| Li(4)-O(3)    | 1.937(3)   | Li(4)-O(2)    | 1.939(3)   |
| Li(4)-O(4)    | 1.946(3)   | Li(4)-O(11)   | 1.961(3)   |
| Li(5)-O(13)   | 1.938(3)   | Li(5)-O(15)   | 1.939(3)   |
| Li(5)-O(14)   | 1.946(3)   | Li(5)-O(12)#1 | 1.978(3)   |
| Li(5)-Li(8)#2 | 2.662(4)   | Li(6)-O(10)   | 1.907(3)   |
| Li(6)-O(16)   | 1.917(3)   | Li(6)-O(13)   | 1.918(3)   |
| Li(6)-O(14)   | 1.982(3)   | Li(6)-Li(8)#2 | 2.560(4)   |
| Li(7)-O(14)   | 1.935(3)   | Li(7)-O(15)   | 1.955(3)   |
| Li(7)-O(16)   | 1.964(3)   | Li(7)-O(17)   | 1.974(3)   |
| Li(7)-Li(8)#2 | 2.617(4)   | Li(8)-O(15)#3 | 1.914(3)   |
| Li(8)-O(8)    | 1.944(3)   | Li(8)-O(16)#3 | 1.974(3)   |
| Li(8)-O(13)#3 | 1.991(3)   | Li(8)-Li(6)#3 | 2.560(4)   |
| Li(8)-Li(7)#3 | 2.617(4)   | Li(8)-Li(5)#3 | 2.662(4)   |
| Li(8)-C(53)#3 | 2.788(3)   | O(1)-C(1)     | 1.3317(18) |
| O(2)-C(9)     | 1.3293(18) | O(3)-C(17)    | 1.3312(18) |
| O(4)-C(25)    | 1.3298(17) | O(5)-C(36)    | 1.439(2)   |
| O(5)-C(33)    | 1.442(2)   | O(6)-C(34)    | 1.428(2)   |
| O(6)-C(35)    | 1.433(2)   | O(7)-C(37)    | 1.433(2)   |
| O(7)-C(40)    | 1.4383(19) | O(8)-C(38)    | 1.4383(19) |
| O(8)-C(39)    | 1.439(2)   | O(9)-C(44)    | 1.4367(19) |
| O(9)-C(41)    | 1.4421(19) | O(10)-C(42)   | 1.4367(19) |
| O(10)-C(43)   | 1.4400(19) | O(11)-C(45)   | 1.436(2)   |
| O(11)-C(48)   | 1.441(2)   | O(12)-C(46)   | 1.442(2)   |
| O(12)-C(47)   | 1.445(2)   | O(12)-Li(5)#4 | 1.978(3)   |
| O(13)-C(53)   | 1.3336(18) | O(13)-Li(8)#2 | 1.991(3)   |
| O(14)-C(61)   | 1.3306(17) | O(15)-C(69)   | 1.3294(17) |
| O(15)-Li(8)#2 | 1.914(3)   | O(16)-C(77)   | 1.3340(18) |
| O(16)-Li(8)#2 | 1.974(3)   | O(17)-C(49)   | 1.436(2)   |
| O(17)-C(52)   | 1.4382(19) | O(18)-C(51)   | 1.427(2)   |
| O(18)-C(50)   | 1.430(2)   | C(1)-C(6)     | 1.406(2)   |
| C(1)-C(2)     | 1.410(2)   | C(2)-C(3)     | 1.388(2)   |
| C(2)-H(2)     | 0.9500     | C(3)-C(4)     | 1.394(2)   |
| C(3)-H(3)     | 0.9500     | C(4)-C(5)     | 1.394(2)   |
| C(4)-C(7)     | 1.515(2)   | C(5)-C(6)     | 1.392(2)   |
| C(5)-H(5)     | 0.9500     | C(6)-H(6)     | 0.9500     |
| C(7)-C(8)     | 1.520(2)   | C(7)-H(7A)    | 0.9900     |
| C(7)-H(7B)    | 0.9900     | C(8)-H(8A)    | 0.9800     |
| C(8)-H(8B)    | 0.9800     | C(8)-H(8C)    | 0.9800     |
| C(9)-C(14)    | 1.402(2)   | C(9)-C(10)    | 1.402(2)   |
| C(10)-C(11)   | 1.390(2)   | C(10)-H(10)   | 0.9500     |
| C(11)-C(12)   | 1.394(2)   | C(11)-H(11)   | 0.9500     |
| C(12)-C(13)   | 1.388(2)   | C(12)-C(15)   | 1.515(2)   |
| C(13)-C(14)   | 1.388(2)   | C(13)-H(13)   | 0.9500     |
| C(14)-H(14)   | 0.9500     | C(15)-C(16)   | 1.489(3)   |

|              |          |               |          |
|--------------|----------|---------------|----------|
| C(15)-H(15A) | 0.9900   | C(15)-H(15B)  | 0.9900   |
| C(16)-H(16A) | 0.9800   | C(16)-H(16B)  | 0.9800   |
| C(16)-H(16C) | 0.9800   | C(17)-C(22)   | 1.401(2) |
| C(17)-C(18)  | 1.404(2) | C(18)-C(19)   | 1.391(2) |
| C(18)-H(18)  | 0.9500   | C(19)-C(20)   | 1.382(3) |
| C(19)-H(19)  | 0.9500   | C(20)-C(21)   | 1.388(3) |
| C(20)-C(23)  | 1.517(2) | C(21)-C(22)   | 1.387(2) |
| C(21)-H(21)  | 0.9500   | C(22)-H(22)   | 0.9500   |
| C(23)-C(24)  | 1.518(3) | C(23)-H(23A)  | 0.9900   |
| C(23)-H(23B) | 0.9900   | C(24)-H(24A)  | 0.9800   |
| C(24)-H(24B) | 0.9800   | C(24)-H(24C)  | 0.9800   |
| C(25)-C(26)  | 1.406(2) | C(25)-C(30)   | 1.411(2) |
| C(26)-C(27)  | 1.389(2) | C(26)-H(26)   | 0.9500   |
| C(27)-C(28)  | 1.395(2) | C(27)-H(27)   | 0.9500   |
| C(28)-C(29)  | 1.396(2) | C(28)-C(31)   | 1.514(2) |
| C(29)-C(30)  | 1.394(2) | C(29)-H(29)   | 0.9500   |
| C(30)-H(30)  | 0.9500   | C(31)-C(32)   | 1.525(3) |
| C(31)-H(31A) | 0.9900   | C(31)-H(31B)  | 0.9900   |
| C(32)-H(32A) | 0.9800   | C(32)-H(32B)  | 0.9800   |
| C(32)-H(32C) | 0.9800   | C(33)-C(34)   | 1.506(2) |
| C(33)-H(33A) | 0.9900   | C(33)-H(33B)  | 0.9900   |
| C(34)-H(34A) | 0.9900   | C(34)-H(34B)  | 0.9900   |
| C(35)-C(36)  | 1.504(2) | C(35)-H(35A)  | 0.9900   |
| C(35)-H(35B) | 0.9900   | C(36)-H(36A)  | 0.9900   |
| C(36)-H(36B) | 0.9900   | C(37)-C(38)   | 1.505(2) |
| C(37)-H(37A) | 0.9900   | C(37)-H(37B)  | 0.9900   |
| C(38)-H(38A) | 0.9900   | C(38)-H(38B)  | 0.9900   |
| C(39)-C(40)  | 1.504(2) | C(39)-H(39A)  | 0.9900   |
| C(39)-H(39B) | 0.9900   | C(40)-H(40A)  | 0.9900   |
| C(40)-H(40B) | 0.9900   | C(41)-C(42)   | 1.503(2) |
| C(41)-H(41A) | 0.9900   | C(41)-H(41B)  | 0.9900   |
| C(42)-H(42A) | 0.9900   | C(42)-H(42B)  | 0.9900   |
| C(43)-C(44)  | 1.502(2) | C(43)-H(43A)  | 0.9900   |
| C(43)-H(43B) | 0.9900   | C(44)-H(44A)  | 0.9900   |
| C(44)-H(44B) | 0.9900   | C(45)-C(46)   | 1.494(2) |
| C(45)-H(45A) | 0.9900   | C(45)-H(45B)  | 0.9900   |
| C(46)-H(46A) | 0.9900   | C(46)-H(46B)  | 0.9900   |
| C(47)-C(48)  | 1.509(2) | C(47)-H(47A)  | 0.9900   |
| C(47)-H(47B) | 0.9900   | C(48)-H(48A)  | 0.9900   |
| C(48)-H(48B) | 0.9900   | C(49)-C(50)   | 1.507(2) |
| C(49)-H(49A) | 0.9900   | C(49)-H(49B)  | 0.9900   |
| C(50)-H(50A) | 0.9900   | C(50)-H(50B)  | 0.9900   |
| C(51)-C(52)  | 1.504(2) | C(51)-H(51A)  | 0.9900   |
| C(51)-H(51B) | 0.9900   | C(52)-H(52A)  | 0.9900   |
| C(52)-H(52B) | 0.9900   | C(53)-C(58)   | 1.404(2) |
| C(53)-C(54)  | 1.406(2) | C(53)-Li(8)#2 | 2.787(3) |
| C(54)-C(55)  | 1.391(2) | C(54)-H(54)   | 0.9500   |
| C(55)-C(56)  | 1.387(2) | C(55)-H(55)   | 0.9500   |
| C(56)-C(57)  | 1.394(3) | C(56)-C(59)   | 1.515(2) |
| C(57)-C(58)  | 1.389(2) | C(57)-H(57)   | 0.9500   |
| C(58)-H(58)  | 0.9500   | C(59)-C(60)   | 1.516(3) |
| C(59)-H(59A) | 0.9900   | C(59)-H(59B)  | 0.9900   |
| C(60)-H(60A) | 0.9800   | C(60)-H(60B)  | 0.9800   |
| C(60)-H(60C) | 0.9800   | C(61)-C(62)   | 1.404(2) |
| C(61)-C(66)  | 1.407(2) | C(62)-C(63)   | 1.390(2) |
| C(62)-H(62)  | 0.9500   | C(63)-C(64)   | 1.391(2) |

|              |          |              |          |
|--------------|----------|--------------|----------|
| C(63)-H(63)  | 0.9500   | C(64)-C(65)  | 1.392(2) |
| C(64)-C(67)  | 1.518(2) | C(65)-C(66)  | 1.387(2) |
| C(65)-H(65)  | 0.9500   | C(66)-H(66)  | 0.9500   |
| C(67)-C(68)  | 1.522(2) | C(67)-H(67A) | 0.9900   |
| C(67)-H(67B) | 0.9900   | C(68)-H(68A) | 0.9800   |
| C(68)-H(68B) | 0.9800   | C(68)-H(68C) | 0.9800   |
| C(69)-C(70)  | 1.401(2) | C(69)-C(74)  | 1.404(2) |
| C(70)-C(71)  | 1.391(2) | C(70)-H(70)  | 0.9500   |
| C(71)-C(72)  | 1.392(2) | C(71)-H(71)  | 0.9500   |
| C(72)-C(73)  | 1.389(2) | C(72)-C(75)  | 1.522(2) |
| C(73)-C(74)  | 1.387(2) | C(73)-H(73)  | 0.9500   |
| C(74)-H(74)  | 0.9500   | C(75)-C(76)  | 1.488(3) |
| C(75)-H(75A) | 0.9900   | C(75)-H(75B) | 0.9900   |
| C(76)-H(76A) | 0.9800   | C(76)-H(76B) | 0.9800   |
| C(76)-H(76C) | 0.9800   | C(77)-C(78)  | 1.405(2) |
| C(77)-C(82)  | 1.407(2) | C(78)-C(79)  | 1.387(2) |
| C(78)-H(78)  | 0.9500   | C(79)-C(80)  | 1.395(2) |
| C(79)-H(79)  | 0.9500   | C(80)-C(81)  | 1.391(2) |
| C(80)-C(83)  | 1.516(2) | C(81)-C(82)  | 1.394(2) |
| C(81)-H(81)  | 0.9500   | C(82)-H(82)  | 0.9500   |
| C(83)-C(84)  | 1.519(3) | C(83)-H(83A) | 0.9900   |
| C(83)-H(83B) | 0.9900   | C(84)-H(84A) | 0.9800   |
| C(84)-H(84B) | 0.9800   | C(84)-H(84C) | 0.9800   |
| O(19)-C(92)  | 1.424(2) | O(19)-C(89)  | 1.425(2) |
| O(20)-C(91)  | 1.420(2) | O(20)-C(90)  | 1.438(2) |
| C(85)-O(21)  | 1.425(3) | C(85)-C(86)  | 1.511(3) |
| C(85)-H(85A) | 0.9900   | C(85)-H(85B) | 0.9900   |
| C(86)-O(22)  | 1.423(3) | C(86)-H(86A) | 0.9900   |
| C(86)-H(86B) | 0.9900   | C(87)-O(22)  | 1.424(2) |
| C(87)-C(88)  | 1.494(3) | C(87)-H(87A) | 0.9900   |
| C(87)-H(87B) | 0.9900   | C(88)-O(21)  | 1.409(2) |
| C(88)-H(88A) | 0.9900   | C(88)-H(88B) | 0.9900   |
| C(89)-C(90)  | 1.496(3) | C(89)-H(89A) | 0.9900   |
| C(89)-H(89B) | 0.9900   | C(90)-H(90A) | 0.9900   |
| C(90)-H(90B) | 0.9900   | C(91)-C(92)  | 1.498(2) |
| C(91)-H(91A) | 0.9900   | C(91)-H(91B) | 0.9900   |
| C(92)-H(92A) | 0.9900   | C(92)-H(92B) | 0.9900   |

|                     |            |                       |            |
|---------------------|------------|-----------------------|------------|
| O(3)-Li(1)-O(1)     | 93.79(12)  | O(3)-Li(1)-O(2)       | 93.69(12)  |
| O(1)-Li(1)-O(2)     | 95.07(12)  | O(3)-Li(1)-O(5)       | 125.46(14) |
| O(1)-Li(1)-O(5)     | 126.31(15) | O(2)-Li(1)-O(5)       | 114.51(14) |
| O(2)-Li(2)-O(7)     | 125.33(15) | O(2)-Li(2)-O(1)       | 96.54(12)  |
| O(7)-Li(2)-O(1)     | 121.00(14) | O(2)-Li(2)-O(4)       | 92.77(12)  |
| O(7)-Li(2)-O(4)     | 118.21(14) | O(1)-Li(2)-O(4)       | 95.94(12)  |
| O(4)-Li(3)-O(9)     | 111.26(14) | O(4)-Li(3)-O(1)       | 99.78(13)  |
| O(9)-Li(3)-O(1)     | 130.61(15) | O(4)-Li(3)-O(3)       | 93.96(12)  |
| O(9)-Li(3)-O(3)     | 120.17(14) | O(1)-Li(3)-O(3)       | 93.80(12)  |
| O(3)-Li(4)-O(2)     | 94.79(12)  | O(3)-Li(4)-O(4)       | 93.89(12)  |
| O(2)-Li(4)-O(4)     | 93.56(12)  | O(3)-Li(4)-O(11)      | 124.43(14) |
| O(2)-Li(4)-O(11)    | 129.40(15) | O(4)-Li(4)-O(11)      | 111.94(14) |
| O(13)-Li(5)-O(15)   | 93.75(12)  | O(13)-Li(5)-O(14)     | 94.38(12)  |
| O(15)-Li(5)-O(14)   | 94.49(12)  | O(13)-Li(5)-O(12)#1   | 112.44(14) |
| O(15)-Li(5)-O(12)#1 | 129.26(15) | O(14)-Li(5)-O(12)#1   | 124.03(14) |
| O(13)-Li(5)-Li(8)#2 | 48.20(9)   | O(15)-Li(5)-Li(8)#2   | 45.91(8)   |
| O(14)-Li(5)-Li(8)#2 | 91.79(12)  | O(12)#1-Li(5)-Li(8)#2 | 142.74(14) |

|                       |            |                       |            |
|-----------------------|------------|-----------------------|------------|
| O(10)-Li(6)-O(16)     | 128.18(15) | O(10)-Li(6)-O(13)     | 112.47(14) |
| O(16)-Li(6)-O(13)     | 100.09(12) | O(10)-Li(6)-O(14)     | 121.08(14) |
| O(16)-Li(6)-O(14)     | 94.37(12)  | O(13)-Li(6)-O(14)     | 93.86(12)  |
| O(10)-Li(6)-Li(8)#2   | 143.52(15) | O(16)-Li(6)-Li(8)#2   | 49.83(9)   |
| O(13)-Li(6)-Li(8)#2   | 50.34(9)   | O(14)-Li(6)-Li(8)#2   | 94.04(12)  |
| O(14)-Li(7)-O(15)     | 94.29(12)  | O(14)-Li(7)-O(16)     | 94.35(12)  |
| O(15)-Li(7)-O(16)     | 95.13(12)  | O(14)-Li(7)-O(17)     | 126.65(15) |
| O(15)-Li(7)-O(17)     | 110.51(13) | O(16)-Li(7)-O(17)     | 127.56(15) |
| O(14)-Li(7)-Li(8)#2   | 93.39(12)  | O(15)-Li(7)-Li(8)#2   | 46.77(9)   |
| O(16)-Li(7)-Li(8)#2   | 48.51(9)   | O(17)-Li(7)-Li(8)#2   | 138.02(14) |
| O(15)#3-Li(8)-O(8)    | 123.05(14) | O(15)#3-Li(8)-O(16)#3 | 96.15(12)  |
| O(8)-Li(8)-O(16)#3    | 121.96(14) | O(15)#3-Li(8)-O(13)#3 | 92.85(12)  |
| O(8)-Li(8)-O(13)#3    | 120.06(14) | O(16)#3-Li(8)-O(13)#3 | 95.70(12)  |
| O(15)#3-Li(8)-Li(6)#3 | 94.52(12)  | O(8)-Li(8)-Li(6)#3    | 142.33(14) |
| O(16)#3-Li(8)-Li(6)#3 | 47.91(9)   | O(13)#3-Li(8)-Li(6)#3 | 47.86(9)   |
| O(15)#3-Li(8)-Li(7)#3 | 48.10(9)   | O(8)-Li(8)-Li(7)#3    | 146.60(15) |
| O(16)#3-Li(8)-Li(7)#3 | 48.20(9)   | O(13)#3-Li(8)-Li(7)#3 | 93.34(12)  |
| Li(6)#3-Li(8)-Li(7)#3 | 61.23(10)  | O(15)#3-Li(8)-Li(5)#3 | 46.68(9)   |
| O(8)-Li(8)-Li(5)#3    | 143.98(15) | O(16)#3-Li(8)-Li(5)#3 | 93.99(12)  |
| O(13)#3-Li(8)-Li(5)#3 | 46.53(9)   | Li(6)#3-Li(8)-Li(5)#3 | 60.76(10)  |
| Li(7)#3-Li(8)-Li(5)#3 | 60.00(10)  | O(15)#3-Li(8)-C(53)#3 | 108.40(12) |
| O(8)-Li(8)-C(53)#3    | 93.85(11)  | O(16)#3-Li(8)-C(53)#3 | 113.82(12) |
| O(13)#3-Li(8)-C(53)#3 | 26.24(6)   | Li(6)#3-Li(8)-C(53)#3 | 69.17(9)   |
| Li(7)#3-Li(8)-C(53)#3 | 119.51(12) | Li(5)#3-Li(8)-C(53)#3 | 66.84(9)   |
| C(1)-O(1)-Li(3)       | 125.67(12) | C(1)-O(1)-Li(1)       | 133.15(12) |
| Li(3)-O(1)-Li(1)      | 86.13(12)  | C(1)-O(1)-Li(2)       | 129.01(12) |
| Li(3)-O(1)-Li(2)      | 82.24(12)  | Li(1)-O(1)-Li(2)      | 83.70(12)  |
| C(9)-O(2)-Li(2)       | 131.17(12) | C(9)-O(2)-Li(4)       | 134.59(12) |
| Li(2)-O(2)-Li(4)      | 87.48(12)  | C(9)-O(2)-Li(1)       | 116.63(12) |
| Li(2)-O(2)-Li(1)      | 84.45(12)  | Li(4)-O(2)-Li(1)      | 85.36(12)  |
| C(17)-O(3)-Li(4)      | 139.20(13) | C(17)-O(3)-Li(1)      | 128.04(12) |
| Li(4)-O(3)-Li(1)      | 86.06(12)  | C(17)-O(3)-Li(3)      | 115.75(12) |
| Li(4)-O(3)-Li(3)      | 85.00(12)  | Li(1)-O(3)-Li(3)      | 85.26(12)  |
| C(25)-O(4)-Li(3)      | 139.07(12) | C(25)-O(4)-Li(4)      | 130.50(12) |
| Li(3)-O(4)-Li(4)      | 86.53(12)  | C(25)-O(4)-Li(2)      | 113.54(12) |
| Li(3)-O(4)-Li(2)      | 81.90(12)  | Li(4)-O(4)-Li(2)      | 85.34(12)  |
| C(36)-O(5)-C(33)      | 110.45(12) | C(36)-O(5)-Li(1)      | 124.60(12) |
| C(33)-O(5)-Li(1)      | 119.87(13) | C(34)-O(6)-C(35)      | 109.29(13) |
| C(37)-O(7)-C(40)      | 109.52(11) | C(37)-O(7)-Li(2)      | 124.15(13) |
| C(40)-O(7)-Li(2)      | 125.53(13) | C(38)-O(8)-C(39)      | 109.40(11) |
| C(38)-O(8)-Li(8)      | 126.06(12) | C(39)-O(8)-Li(8)      | 124.00(12) |
| C(44)-O(9)-C(41)      | 110.55(11) | C(44)-O(9)-Li(3)      | 134.11(12) |
| C(41)-O(9)-Li(3)      | 114.64(12) | C(42)-O(10)-C(43)     | 110.78(11) |
| C(42)-O(10)-Li(6)     | 130.89(12) | C(43)-O(10)-Li(6)     | 117.94(12) |
| C(45)-O(11)-C(48)     | 109.16(13) | C(45)-O(11)-Li(4)     | 126.80(13) |
| C(48)-O(11)-Li(4)     | 121.00(12) | C(46)-O(12)-C(47)     | 109.80(12) |
| C(46)-O(12)-Li(5)#4   | 115.01(12) | C(47)-O(12)-Li(5)#4   | 131.68(13) |
| C(53)-O(13)-Li(6)     | 137.82(12) | C(53)-O(13)-Li(5)     | 132.38(12) |
| Li(6)-O(13)-Li(5)     | 86.50(12)  | C(53)-O(13)-Li(8)#2   | 112.45(12) |
| Li(6)-O(13)-Li(8)#2   | 81.79(12)  | Li(5)-O(13)-Li(8)#2   | 85.27(11)  |
| C(61)-O(14)-Li(7)     | 134.09(12) | C(61)-O(14)-Li(5)     | 136.36(12) |
| Li(7)-O(14)-Li(5)     | 85.72(12)  | C(61)-O(14)-Li(6)     | 111.81(12) |
| Li(7)-O(14)-Li(6)     | 84.63(11)  | Li(5)-O(14)-Li(6)     | 84.56(12)  |
| C(69)-O(15)-Li(8)#2   | 133.19(12) | C(69)-O(15)-Li(5)     | 130.08(12) |
| Li(8)#2-O(15)-Li(5)   | 87.40(12)  | C(69)-O(15)-Li(7)     | 119.79(12) |
| Li(8)#2-O(15)-Li(7)   | 85.13(12)  | Li(5)-O(15)-Li(7)     | 85.36(12)  |

|                     |            |                     |            |
|---------------------|------------|---------------------|------------|
| C(77)-O(16)-Li(6)   | 130.69(12) | C(77)-O(16)-Li(7)   | 132.86(12) |
| Li(6)-O(16)-Li(7)   | 85.58(12)  | C(77)-O(16)-Li(8)#2 | 124.63(12) |
| Li(6)-O(16)-Li(8)#2 | 82.25(12)  | Li(7)-O(16)-Li(8)#2 | 83.29(12)  |
| C(49)-O(17)-C(52)   | 110.71(12) | C(49)-O(17)-Li(7)   | 125.24(12) |
| C(52)-O(17)-Li(7)   | 120.91(12) | C(51)-O(18)-C(50)   | 108.94(13) |
| O(1)-C(1)-C(6)      | 121.63(13) | O(1)-C(1)-C(2)      | 121.60(14) |
| C(6)-C(1)-C(2)      | 116.76(14) | C(3)-C(2)-C(1)      | 121.09(15) |
| C(3)-C(2)-H(2)      | 119.5      | C(1)-C(2)-H(2)      | 119.5      |
| C(2)-C(3)-C(4)      | 121.93(15) | C(2)-C(3)-H(3)      | 119.0      |
| C(4)-C(3)-H(3)      | 119.0      | C(3)-C(4)-C(5)      | 117.17(14) |
| C(3)-C(4)-C(7)      | 120.90(15) | C(5)-C(4)-C(7)      | 121.88(15) |
| C(6)-C(5)-C(4)      | 121.61(15) | C(6)-C(5)-H(5)      | 119.2      |
| C(4)-C(5)-H(5)      | 119.2      | C(5)-C(6)-C(1)      | 121.32(14) |
| C(5)-C(6)-H(6)      | 119.3      | C(1)-C(6)-H(6)      | 119.3      |
| C(4)-C(7)-C(8)      | 112.31(14) | C(4)-C(7)-H(7A)     | 109.1      |
| C(8)-C(7)-H(7A)     | 109.1      | C(4)-C(7)-H(7B)     | 109.1      |
| C(8)-C(7)-H(7B)     | 109.1      | H(7A)-C(7)-H(7B)    | 107.9      |
| C(7)-C(8)-H(8A)     | 109.5      | C(7)-C(8)-H(8B)     | 109.5      |
| H(8A)-C(8)-H(8B)    | 109.5      | C(7)-C(8)-H(8C)     | 109.5      |
| H(8A)-C(8)-H(8C)    | 109.5      | H(8B)-C(8)-H(8C)    | 109.5      |
| O(2)-C(9)-C(14)     | 121.52(14) | O(2)-C(9)-C(10)     | 121.44(13) |
| C(14)-C(9)-C(10)    | 117.02(14) | C(11)-C(10)-C(9)    | 121.17(14) |
| C(11)-C(10)-H(10)   | 119.4      | C(9)-C(10)-H(10)    | 119.4      |
| C(10)-C(11)-C(12)   | 121.51(15) | C(10)-C(11)-H(11)   | 119.2      |
| C(12)-C(11)-H(11)   | 119.2      | C(13)-C(12)-C(11)   | 117.36(15) |
| C(13)-C(12)-C(15)   | 121.25(16) | C(11)-C(12)-C(15)   | 121.38(16) |
| C(14)-C(13)-C(12)   | 121.73(15) | C(14)-C(13)-H(13)   | 119.1      |
| C(12)-C(13)-H(13)   | 119.1      | C(13)-C(14)-C(9)    | 121.21(15) |
| C(13)-C(14)-H(14)   | 119.4      | C(9)-C(14)-H(14)    | 119.4      |
| C(16)-C(15)-C(12)   | 112.98(17) | C(16)-C(15)-H(15A)  | 109.0      |
| C(12)-C(15)-H(15A)  | 109.0      | C(16)-C(15)-H(15B)  | 109.0      |
| C(12)-C(15)-H(15B)  | 109.0      | H(15A)-C(15)-H(15B) | 107.8      |
| C(15)-C(16)-H(16A)  | 109.5      | C(15)-C(16)-H(16B)  | 109.5      |
| H(16A)-C(16)-H(16B) | 109.5      | C(15)-C(16)-H(16C)  | 109.5      |
| H(16A)-C(16)-H(16C) | 109.5      | H(16B)-C(16)-H(16C) | 109.5      |
| O(3)-C(17)-C(22)    | 121.65(14) | O(3)-C(17)-C(18)    | 121.48(14) |
| C(22)-C(17)-C(18)   | 116.86(14) | C(19)-C(18)-C(17)   | 121.42(15) |
| C(19)-C(18)-H(18)   | 119.3      | C(17)-C(18)-H(18)   | 119.3      |
| C(20)-C(19)-C(18)   | 121.51(16) | C(20)-C(19)-H(19)   | 119.2      |
| C(18)-C(19)-H(19)   | 119.2      | C(19)-C(20)-C(21)   | 117.18(15) |
| C(19)-C(20)-C(23)   | 122.23(17) | C(21)-C(20)-C(23)   | 120.55(17) |
| C(22)-C(21)-C(20)   | 122.36(16) | C(22)-C(21)-H(21)   | 118.8      |
| C(20)-C(21)-H(21)   | 118.8      | C(21)-C(22)-C(17)   | 120.65(16) |
| C(21)-C(22)-H(22)   | 119.7      | C(17)-C(22)-H(22)   | 119.7      |
| C(20)-C(23)-C(24)   | 112.45(15) | C(20)-C(23)-H(23A)  | 109.1      |
| C(24)-C(23)-H(23A)  | 109.1      | C(20)-C(23)-H(23B)  | 109.1      |
| C(24)-C(23)-H(23B)  | 109.1      | H(23A)-C(23)-H(23B) | 107.8      |
| C(23)-C(24)-H(24A)  | 109.5      | C(23)-C(24)-H(24B)  | 109.5      |
| H(24A)-C(24)-H(24B) | 109.5      | C(23)-C(24)-H(24C)  | 109.5      |
| H(24A)-C(24)-H(24C) | 109.5      | H(24B)-C(24)-H(24C) | 109.5      |
| O(4)-C(25)-C(26)    | 121.29(14) | O(4)-C(25)-C(30)    | 121.73(14) |
| C(26)-C(25)-C(30)   | 116.97(14) | C(27)-C(26)-C(25)   | 121.42(15) |
| C(27)-C(26)-H(26)   | 119.3      | C(25)-C(26)-H(26)   | 119.3      |
| C(26)-C(27)-C(28)   | 121.57(15) | C(26)-C(27)-H(27)   | 119.2      |
| C(28)-C(27)-H(27)   | 119.2      | C(27)-C(28)-C(29)   | 117.40(15) |
| C(27)-C(28)-C(31)   | 120.90(16) | C(29)-C(28)-C(31)   | 121.59(16) |

|                     |            |                     |            |
|---------------------|------------|---------------------|------------|
| C(30)-C(29)-C(28)   | 121.70(15) | C(30)-C(29)-H(29)   | 119.1      |
| C(28)-C(29)-H(29)   | 119.1      | C(29)-C(30)-C(25)   | 120.90(15) |
| C(29)-C(30)-H(30)   | 119.6      | C(25)-C(30)-H(30)   | 119.6      |
| C(28)-C(31)-C(32)   | 111.91(14) | C(28)-C(31)-H(31A)  | 109.2      |
| C(32)-C(31)-H(31A)  | 109.2      | C(28)-C(31)-H(31B)  | 109.2      |
| C(32)-C(31)-H(31B)  | 109.2      | H(31A)-C(31)-H(31B) | 107.9      |
| C(31)-C(32)-H(32A)  | 109.5      | C(31)-C(32)-H(32B)  | 109.5      |
| H(32A)-C(32)-H(32B) | 109.5      | C(31)-C(32)-H(32C)  | 109.5      |
| H(32A)-C(32)-H(32C) | 109.5      | H(32B)-C(32)-H(32C) | 109.5      |
| O(5)-C(33)-C(34)    | 110.58(14) | O(5)-C(33)-H(33A)   | 109.5      |
| C(34)-C(33)-H(33A)  | 109.5      | O(5)-C(33)-H(33B)   | 109.5      |
| C(34)-C(33)-H(33B)  | 109.5      | H(33A)-C(33)-H(33B) | 108.1      |
| O(6)-C(34)-C(33)    | 110.63(14) | O(6)-C(34)-H(34A)   | 109.5      |
| C(33)-C(34)-H(34A)  | 109.5      | O(6)-C(34)-H(34B)   | 109.5      |
| C(33)-C(34)-H(34B)  | 109.5      | H(34A)-C(34)-H(34B) | 108.1      |
| O(6)-C(35)-C(36)    | 111.13(14) | O(6)-C(35)-H(35A)   | 109.4      |
| C(36)-C(35)-H(35A)  | 109.4      | O(6)-C(35)-H(35B)   | 109.4      |
| C(36)-C(35)-H(35B)  | 109.4      | H(35A)-C(35)-H(35B) | 108.0      |
| O(5)-C(36)-C(35)    | 110.84(14) | O(5)-C(36)-H(36A)   | 109.5      |
| C(35)-C(36)-H(36A)  | 109.5      | O(5)-C(36)-H(36B)   | 109.5      |
| C(35)-C(36)-H(36B)  | 109.5      | H(36A)-C(36)-H(36B) | 108.1      |
| O(7)-C(37)-C(38)    | 110.70(13) | O(7)-C(37)-H(37A)   | 109.5      |
| C(38)-C(37)-H(37A)  | 109.5      | O(7)-C(37)-H(37B)   | 109.5      |
| C(38)-C(37)-H(37B)  | 109.5      | H(37A)-C(37)-H(37B) | 108.1      |
| O(8)-C(38)-C(37)    | 110.12(13) | O(8)-C(38)-H(38A)   | 109.6      |
| C(37)-C(38)-H(38A)  | 109.6      | O(8)-C(38)-H(38B)   | 109.6      |
| C(37)-C(38)-H(38B)  | 109.6      | H(38A)-C(38)-H(38B) | 108.2      |
| O(8)-C(39)-C(40)    | 109.89(13) | O(8)-C(39)-H(39A)   | 109.7      |
| C(40)-C(39)-H(39A)  | 109.7      | O(8)-C(39)-H(39B)   | 109.7      |
| C(40)-C(39)-H(39B)  | 109.7      | H(39A)-C(39)-H(39B) | 108.2      |
| O(7)-C(40)-C(39)    | 110.10(13) | O(7)-C(40)-H(40A)   | 109.6      |
| C(39)-C(40)-H(40A)  | 109.6      | O(7)-C(40)-H(40B)   | 109.6      |
| C(39)-C(40)-H(40B)  | 109.6      | H(40A)-C(40)-H(40B) | 108.2      |
| O(9)-C(41)-C(42)    | 110.10(13) | O(9)-C(41)-H(41A)   | 109.6      |
| C(42)-C(41)-H(41A)  | 109.6      | O(9)-C(41)-H(41B)   | 109.6      |
| C(42)-C(41)-H(41B)  | 109.6      | H(41A)-C(41)-H(41B) | 108.2      |
| O(10)-C(42)-C(41)   | 110.04(13) | O(10)-C(42)-H(42A)  | 109.7      |
| C(41)-C(42)-H(42A)  | 109.7      | O(10)-C(42)-H(42B)  | 109.7      |
| C(41)-C(42)-H(42B)  | 109.7      | H(42A)-C(42)-H(42B) | 108.2      |
| O(10)-C(43)-C(44)   | 110.26(13) | O(10)-C(43)-H(43A)  | 109.6      |
| C(44)-C(43)-H(43A)  | 109.6      | O(10)-C(43)-H(43B)  | 109.6      |
| C(44)-C(43)-H(43B)  | 109.6      | H(43A)-C(43)-H(43B) | 108.1      |
| O(9)-C(44)-C(43)    | 110.16(13) | O(9)-C(44)-H(44A)   | 109.6      |
| C(43)-C(44)-H(44A)  | 109.6      | O(9)-C(44)-H(44B)   | 109.6      |
| C(43)-C(44)-H(44B)  | 109.6      | H(44A)-C(44)-H(44B) | 108.1      |
| O(11)-C(45)-C(46)   | 110.77(14) | O(11)-C(45)-H(45A)  | 109.5      |
| C(46)-C(45)-H(45A)  | 109.5      | O(11)-C(45)-H(45B)  | 109.5      |
| C(46)-C(45)-H(45B)  | 109.5      | H(45A)-C(45)-H(45B) | 108.1      |
| O(12)-C(46)-C(45)   | 110.05(14) | O(12)-C(46)-H(46A)  | 109.7      |
| C(45)-C(46)-H(46A)  | 109.6      | O(12)-C(46)-H(46B)  | 109.7      |
| C(45)-C(46)-H(46B)  | 109.7      | H(46A)-C(46)-H(46B) | 108.2      |
| O(12)-C(47)-C(48)   | 110.17(14) | O(12)-C(47)-H(47A)  | 109.6      |
| C(48)-C(47)-H(47A)  | 109.6      | O(12)-C(47)-H(47B)  | 109.6      |
| C(48)-C(47)-H(47B)  | 109.6      | H(47A)-C(47)-H(47B) | 108.1      |
| O(11)-C(48)-C(47)   | 110.75(14) | O(11)-C(48)-H(48A)  | 109.5      |
| C(47)-C(48)-H(48A)  | 109.5      | O(11)-C(48)-H(48B)  | 109.5      |

|                     |            |                     |            |
|---------------------|------------|---------------------|------------|
| C(47)-C(48)-H(48B)  | 109.5      | H(48A)-C(48)-H(48B) | 108.1      |
| O(17)-C(49)-C(50)   | 110.56(14) | O(17)-C(49)-H(49A)  | 109.5      |
| C(50)-C(49)-H(49A)  | 109.5      | O(17)-C(49)-H(49B)  | 109.5      |
| C(50)-C(49)-H(49B)  | 109.5      | H(49A)-C(49)-H(49B) | 108.1      |
| O(18)-C(50)-C(49)   | 110.51(15) | O(18)-C(50)-H(50A)  | 109.5      |
| C(49)-C(50)-H(50A)  | 109.5      | O(18)-C(50)-H(50B)  | 109.5      |
| C(49)-C(50)-H(50B)  | 109.5      | H(50A)-C(50)-H(50B) | 108.1      |
| O(18)-C(51)-C(52)   | 111.12(14) | O(18)-C(51)-H(51A)  | 109.4      |
| C(52)-C(51)-H(51A)  | 109.4      | O(18)-C(51)-H(51B)  | 109.4      |
| C(52)-C(51)-H(51B)  | 109.4      | H(51A)-C(51)-H(51B) | 108.0      |
| O(17)-C(52)-C(51)   | 110.80(14) | O(17)-C(52)-H(52A)  | 109.5      |
| C(51)-C(52)-H(52A)  | 109.5      | O(17)-C(52)-H(52B)  | 109.5      |
| C(51)-C(52)-H(52B)  | 109.5      | H(52A)-C(52)-H(52B) | 108.1      |
| O(13)-C(53)-C(54)   | 121.18(14) | O(13)-C(53)-C(54)   | 121.57(14) |
| C(58)-C(53)-C(54)   | 117.24(14) | O(13)-C(53)-Li(8)#2 | 41.31(8)   |
| C(58)-C(53)-Li(8)#2 | 107.26(11) | C(54)-C(53)-Li(8)#2 | 118.24(11) |
| C(55)-C(54)-C(53)   | 120.74(15) | C(55)-C(54)-H(54)   | 119.6      |
| C(53)-C(54)-H(54)   | 119.6      | C(56)-C(55)-C(54)   | 122.02(15) |
| C(56)-C(55)-H(55)   | 119.0      | C(54)-C(55)-H(55)   | 119.0      |
| C(55)-C(56)-C(57)   | 117.20(15) | C(55)-C(56)-C(59)   | 121.51(17) |
| C(57)-C(56)-C(59)   | 121.18(16) | C(58)-C(57)-C(56)   | 121.82(15) |
| C(58)-C(57)-H(57)   | 119.1      | C(56)-C(57)-H(57)   | 119.1      |
| C(57)-C(58)-C(53)   | 120.94(15) | C(57)-C(58)-H(58)   | 119.5      |
| C(53)-C(58)-H(58)   | 119.5      | C(56)-C(59)-C(60)   | 112.12(16) |
| C(56)-C(59)-H(59A)  | 109.2      | C(60)-C(59)-H(59A)  | 109.2      |
| C(56)-C(59)-H(59B)  | 109.2      | C(60)-C(59)-H(59B)  | 109.2      |
| H(59A)-C(59)-H(59B) | 107.9      | C(59)-C(60)-H(60A)  | 109.5      |
| C(59)-C(60)-H(60B)  | 109.5      | H(60A)-C(60)-H(60B) | 109.5      |
| C(59)-C(60)-H(60C)  | 109.5      | H(60A)-C(60)-H(60C) | 109.5      |
| H(60B)-C(60)-H(60C) | 109.5      | O(14)-C(61)-C(62)   | 121.89(13) |
| O(14)-C(61)-C(66)   | 121.47(14) | C(62)-C(61)-C(66)   | 116.64(14) |
| C(63)-C(62)-C(61)   | 121.43(14) | C(63)-C(62)-H(62)   | 119.3      |
| C(61)-C(62)-H(62)   | 119.3      | C(62)-C(63)-C(64)   | 121.63(15) |
| C(62)-C(63)-H(63)   | 119.2      | C(64)-C(63)-H(63)   | 119.2      |
| C(63)-C(64)-C(65)   | 117.23(14) | C(63)-C(64)-C(67)   | 121.89(15) |
| C(65)-C(64)-C(67)   | 120.87(15) | C(66)-C(65)-C(64)   | 121.80(14) |
| C(66)-C(65)-H(65)   | 119.1      | C(64)-C(65)-H(65)   | 119.1      |
| C(65)-C(66)-C(61)   | 121.27(14) | C(65)-C(66)-H(66)   | 119.4      |
| C(61)-C(66)-H(66)   | 119.4      | C(64)-C(67)-C(68)   | 113.17(14) |
| C(64)-C(67)-H(67A)  | 108.9      | C(68)-C(67)-H(67A)  | 108.9      |
| C(64)-C(67)-H(67B)  | 108.9      | C(68)-C(67)-H(67B)  | 108.9      |
| H(67A)-C(67)-H(67B) | 107.8      | C(67)-C(68)-H(68A)  | 109.5      |
| C(67)-C(68)-H(68B)  | 109.5      | H(68A)-C(68)-H(68B) | 109.5      |
| C(67)-C(68)-H(68C)  | 109.5      | H(68A)-C(68)-H(68C) | 109.5      |
| H(68B)-C(68)-H(68C) | 109.5      | O(15)-C(69)-C(70)   | 121.27(14) |
| O(15)-C(69)-C(74)   | 121.83(14) | C(70)-C(69)-C(74)   | 116.90(14) |
| C(71)-C(70)-C(69)   | 121.40(15) | C(71)-C(70)-H(70)   | 119.3      |
| C(69)-C(70)-H(70)   | 119.3      | C(70)-C(71)-C(72)   | 121.50(16) |
| C(70)-C(71)-H(71)   | 119.3      | C(72)-C(71)-H(71)   | 119.3      |
| C(73)-C(72)-C(71)   | 117.05(15) | C(73)-C(72)-C(75)   | 120.65(16) |
| C(71)-C(72)-C(75)   | 122.27(16) | C(74)-C(73)-C(72)   | 122.21(15) |
| C(74)-C(73)-H(73)   | 118.9      | C(72)-C(73)-H(73)   | 118.9      |
| C(73)-C(74)-C(69)   | 120.92(15) | C(73)-C(74)-H(74)   | 119.5      |
| C(69)-C(74)-H(74)   | 119.5      | C(76)-C(75)-C(72)   | 115.89(17) |
| C(76)-C(75)-H(75A)  | 108.3      | C(72)-C(75)-H(75A)  | 108.3      |
| C(76)-C(75)-H(75B)  | 108.3      | C(72)-C(75)-H(75B)  | 108.3      |

|                     |            |                     |            |
|---------------------|------------|---------------------|------------|
| H(75A)-C(75)-H(75B) | 107.4      | C(75)-C(76)-H(76A)  | 109.5      |
| C(75)-C(76)-H(76B)  | 109.5      | H(76A)-C(76)-H(76B) | 109.5      |
| C(75)-C(76)-H(76C)  | 109.5      | H(76A)-C(76)-H(76C) | 109.5      |
| H(76B)-C(76)-H(76C) | 109.5      | O(16)-C(77)-C(78)   | 121.55(13) |
| O(16)-C(77)-C(82)   | 121.82(13) | C(78)-C(77)-C(82)   | 116.62(13) |
| C(79)-C(78)-C(77)   | 121.32(14) | C(79)-C(78)-H(78)   | 119.3      |
| C(77)-C(78)-H(78)   | 119.3      | C(78)-C(79)-C(80)   | 121.91(14) |
| C(78)-C(79)-H(79)   | 119.0      | C(80)-C(79)-H(79)   | 119.0      |
| C(81)-C(80)-C(79)   | 117.04(14) | C(81)-C(80)-C(83)   | 121.85(15) |
| C(79)-C(80)-C(83)   | 121.06(15) | C(80)-C(81)-C(82)   | 121.71(14) |
| C(80)-C(81)-H(81)   | 119.1      | C(82)-C(81)-H(81)   | 119.1      |
| C(81)-C(82)-C(77)   | 121.23(14) | C(81)-C(82)-H(82)   | 119.4      |
| C(77)-C(82)-H(82)   | 119.4      | C(80)-C(83)-C(84)   | 112.90(14) |
| C(80)-C(83)-H(83A)  | 109.0      | C(84)-C(83)-H(83A)  | 109.0      |
| C(80)-C(83)-H(83B)  | 109.0      | C(84)-C(83)-H(83B)  | 109.0      |
| H(83A)-C(83)-H(83B) | 107.8      | C(83)-C(84)-H(84A)  | 109.5      |
| C(83)-C(84)-H(84B)  | 109.5      | H(84A)-C(84)-H(84B) | 109.5      |
| C(83)-C(84)-H(84C)  | 109.5      | H(84A)-C(84)-H(84C) | 109.5      |
| H(84B)-C(84)-H(84C) | 109.5      | C(92)-O(19)-C(89)   | 108.80(13) |
| C(91)-O(20)-C(90)   | 109.37(14) | O(21)-C(85)-C(86)   | 110.81(17) |
| O(21)-C(85)-H(85A)  | 109.5      | C(86)-C(85)-H(85A)  | 109.5      |
| O(21)-C(85)-H(85B)  | 109.5      | C(86)-C(85)-H(85B)  | 109.5      |
| H(85A)-C(85)-H(85B) | 108.1      | O(22)-C(86)-C(85)   | 109.77(19) |
| O(22)-C(86)-H(86A)  | 109.7      | C(85)-C(86)-H(86A)  | 109.7      |
| O(22)-C(86)-H(86B)  | 109.7      | C(85)-C(86)-H(86B)  | 109.7      |
| H(86A)-C(86)-H(86B) | 108.2      | O(22)-C(87)-C(88)   | 109.51(16) |
| O(22)-C(87)-H(87A)  | 109.8      | C(88)-C(87)-H(87A)  | 109.8      |
| O(22)-C(87)-H(87B)  | 109.8      | C(88)-C(87)-H(87B)  | 109.8      |
| H(87A)-C(87)-H(87B) | 108.2      | O(21)-C(88)-C(87)   | 111.05(16) |
| O(21)-C(88)-H(88A)  | 109.4      | C(87)-C(88)-H(88A)  | 109.4      |
| O(21)-C(88)-H(88B)  | 109.4      | C(87)-C(88)-H(88B)  | 109.4      |
| H(88A)-C(88)-H(88B) | 108.0      | C(88)-O(21)-C(85)   | 108.30(16) |
| C(86)-O(22)-C(87)   | 109.19(16) | O(19)-C(89)-C(90)   | 110.33(15) |
| O(19)-C(89)-H(89A)  | 109.6      | C(90)-C(89)-H(89A)  | 109.6      |
| O(19)-C(89)-H(89B)  | 109.6      | C(90)-C(89)-H(89B)  | 109.6      |
| H(89A)-C(89)-H(89B) | 108.1      | O(20)-C(90)-C(89)   | 110.58(15) |
| O(20)-C(90)-H(90A)  | 109.5      | C(89)-C(90)-H(90A)  | 109.5      |
| O(20)-C(90)-H(90B)  | 109.5      | C(89)-C(90)-H(90B)  | 109.5      |
| H(90A)-C(90)-H(90B) | 108.1      | O(20)-C(91)-C(92)   | 110.31(15) |
| O(20)-C(91)-H(91A)  | 109.6      | C(92)-C(91)-H(91A)  | 109.6      |
| O(20)-C(91)-H(91B)  | 109.6      | C(92)-C(91)-H(91B)  | 109.6      |
| H(91A)-C(91)-H(91B) | 108.1      | O(19)-C(92)-C(91)   | 110.38(15) |
| O(19)-C(92)-H(92A)  | 109.6      | C(91)-C(92)-H(92A)  | 109.6      |
| O(19)-C(92)-H(92B)  | 109.6      | C(91)-C(92)-H(92B)  | 109.6      |
| H(92A)-C(92)-H(92B) | 108.1      |                     |            |

---

Symmetry transformations used to generate equivalent atoms:

#1 x-1,y,z #2 x,y-1,z #3 x,y+1,z #4 x+1,y,z



**[{(C<sub>10</sub>H<sub>7</sub>OLi)<sub>4</sub>·2Dioxane}·3Dioxane]<sub>z</sub>, 3**

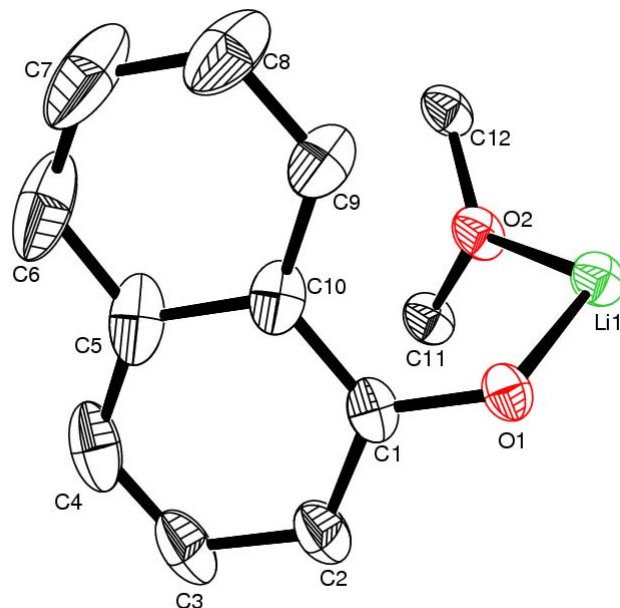

Table 5. Crystal data and structure refinement for **3**

|                                  |                                                      |          |
|----------------------------------|------------------------------------------------------|----------|
| Identification code              | dmd14sq                                              |          |
| Empirical formula                | C <sub>15</sub> H <sub>17</sub> Li O <sub>3.50</sub> |          |
| Formula weight                   | 260.23                                               |          |
| Temperature                      | 100(2) K                                             |          |
| Wavelength                       | 0.71073 Å                                            |          |
| Crystal system                   | tetragonal                                           |          |
| Space group                      | I4(1)/a                                              |          |
| Unit cell dimensions             | a = 15.0031(1) Å                                     | α = 90°. |
|                                  | b = 15.0031(1) Å                                     | β = 90°. |
|                                  | c = 24.7185(4) Å                                     | γ = 90°. |
| Volume                           | 5563.96(10) Å <sup>3</sup>                           |          |
| Z                                | 16                                                   |          |
| Density (calculated)             | 1.243 Mg/m <sup>3</sup>                              |          |
| Absorption coefficient           | 0.086 mm <sup>-1</sup>                               |          |
| F(000)                           | 2208                                                 |          |
| Crystal size                     | 0.32 x 0.32 x 0.32 mm <sup>3</sup>                   |          |
| Crystal color and habit          | clear colorless octahedron                           |          |
| Diffractometer                   | Bruker SMART APEX CCD area detector                  |          |
| Theta range for data collection  | 1.59 to 30.51°                                       |          |
| Index ranges                     | -16 ≤ h ≤ 20, -21 ≤ k ≤ 9, -34 ≤ l ≤ 23              |          |
| Reflections collected            | 18864                                                |          |
| Independent reflections          | 4247 [R(int) = 0.0234]                               |          |
| Observed reflections (I > 2σ(I)) | 3158                                                 |          |
| Completeness to theta = 30.51°   | 99.8 %                                               |          |
| Absorption correction            | semi-empirical from equivalents                      |          |
| Max. and min. transmission       | 0.9730 and 0.8112                                    |          |
| Solution method                  | SHELXS-97 (Sheldrick, 1990)                          |          |
| Refinement method                | SHELXL-97 (Sheldrick, 1997)                          |          |
| Data / restraints / parameters   | 4247 / 0 / 136                                       |          |

|                                   |                                    |
|-----------------------------------|------------------------------------|
| Goodness-of-fit on F <sup>2</sup> | 1.161                              |
| Final R indices [I>2sigma(I)]     | R1 = 0.0458, wR2 = 0.1319          |
| R indices (all data)              | R1 = 0.0583, wR2 = 0.1360          |
| Largest diff. peak and hole       | 0.272 and -0.206 e.Å <sup>-3</sup> |

Table 6. Bond lengths [Å] and angles [°] for **3**.

|                       |            |                       |            |
|-----------------------|------------|-----------------------|------------|
| Li(1)-O(2)            | 1.9349(16) | Li(1)-O(1)#1          | 1.9490(16) |
| Li(1)-O(1)            | 1.9519(16) | Li(1)-O(1)#2          | 1.9531(17) |
| Li(1)-Li(1)#2         | 2.605(3)   | Li(1)-Li(1)#1         | 2.658(3)   |
| Li(1)-Li(1)#3         | 2.658(3)   | O(1)-C(1)             | 1.3285(10) |
| O(1)-Li(1)#3          | 1.9490(16) | O(1)-Li(1)#2          | 1.9531(17) |
| O(2)-C(12)            | 1.4370(11) | O(2)-C(11)            | 1.4377(11) |
| C(1)-C(2)             | 1.3824(14) | C(1)-C(10)            | 1.4402(14) |
| C(2)-C(3)             | 1.4092(14) | C(2)-H(2)             | 0.9500     |
| C(3)-C(4)             | 1.3572(18) | C(3)-H(3)             | 0.9500     |
| C(4)-C(5)             | 1.4163(18) | C(4)-H(4)             | 0.9500     |
| C(5)-C(6)             | 1.4220(18) | C(5)-C(10)            | 1.4245(14) |
| C(6)-C(7)             | 1.356(2)   | C(6)-H(6)             | 0.9500     |
| C(7)-C(8)             | 1.399(2)   | C(7)-H(7)             | 0.9500     |
| C(8)-C(9)             | 1.3682(16) | C(8)-H(8)             | 0.9500     |
| C(9)-C(10)            | 1.4153(15) | C(9)-H(9)             | 0.9500     |
| C(11)-C(12)#4         | 1.5065(13) | C(11)-H(11A)          | 0.9900     |
| C(11)-H(11B)          | 0.9900     | C(12)-C(11)#4         | 1.5065(13) |
| C(12)-H(12A)          | 0.9900     | C(12)-H(12B)          | 0.9900     |
| O(2)-Li(1)-O(1)#1     | 126.94(9)  | O(2)-Li(1)-O(1)       | 110.28(8)  |
| O(1)#1-Li(1)-O(1)     | 93.78(7)   | O(2)-Li(1)-O(1)#2     | 127.58(8)  |
| O(1)#1-Li(1)-O(1)#2   | 93.74(7)   | O(1)-Li(1)-O(1)#2     | 96.28(7)   |
| O(2)-Li(1)-Li(1)#2    | 136.93(5)  | O(1)#1-Li(1)-Li(1)#2  | 94.46(5)   |
| O(1)-Li(1)-Li(1)#2    | 48.17(5)   | O(1)#2-Li(1)-Li(1)#2  | 48.13(6)   |
| O(2)-Li(1)-Li(1)#1    | 156.93(9)  | O(1)#1-Li(1)-Li(1)#1  | 47.09(6)   |
| O(1)-Li(1)-Li(1)#1    | 92.77(5)   | O(1)#2-Li(1)-Li(1)#1  | 47.00(4)   |
| Li(1)#2-Li(1)-Li(1)#1 | 60.65(3)   | O(2)-Li(1)-Li(1)#3    | 138.34(9)  |
| O(1)#1-Li(1)-Li(1)#3  | 47.13(6)   | O(1)-Li(1)-Li(1)#3    | 47.00(4)   |
| O(1)#2-Li(1)-Li(1)#3  | 92.74(5)   | Li(1)#2-Li(1)-Li(1)#3 | 60.65(3)   |
| Li(1)#1-Li(1)-Li(1)#3 | 58.69(7)   | C(1)-O(1)-Li(1)#3     | 129.90(7)  |
| C(1)-O(1)-Li(1)       | 117.34(7)  | Li(1)#3-O(1)-Li(1)    | 85.91(7)   |
| C(1)-O(1)-Li(1)#2     | 136.88(7)  | Li(1)#3-O(1)-Li(1)#2  | 85.87(7)   |
| Li(1)-O(1)-Li(1)#2    | 83.70(7)   | C(12)-O(2)-C(11)      | 110.14(6)  |
| C(12)-O(2)-Li(1)      | 125.44(7)  | C(11)-O(2)-Li(1)      | 124.05(7)  |
| O(1)-C(1)-C(2)        | 121.74(9)  | O(1)-C(1)-C(10)       | 119.99(9)  |
| C(2)-C(1)-C(10)       | 118.27(8)  | C(1)-C(2)-C(3)        | 121.34(10) |
| C(1)-C(2)-H(2)        | 119.3      | C(3)-C(2)-H(2)        | 119.3      |
| C(4)-C(3)-C(2)        | 121.29(11) | C(4)-C(3)-H(3)        | 119.4      |
| C(2)-C(3)-H(3)        | 119.4      | C(3)-C(4)-C(5)        | 119.99(9)  |
| C(3)-C(4)-H(4)        | 120.0      | C(5)-C(4)-H(4)        | 120.0      |
| C(4)-C(5)-C(6)        | 122.52(11) | C(4)-C(5)-C(10)       | 119.55(10) |
| C(6)-C(5)-C(10)       | 117.93(12) | C(7)-C(6)-C(5)        | 121.77(12) |
| C(7)-C(6)-H(6)        | 119.1      | C(5)-C(6)-H(6)        | 119.1      |
| C(6)-C(7)-C(8)        | 120.16(12) | C(6)-C(7)-H(7)        | 119.9      |
| C(8)-C(7)-H(7)        | 119.9      | C(9)-C(8)-C(7)        | 120.33(14) |
| C(9)-C(8)-H(8)        | 119.8      | C(7)-C(8)-H(8)        | 119.8      |
| C(8)-C(9)-C(10)       | 121.07(11) | C(8)-C(9)-H(9)        | 119.5      |
| C(10)-C(9)-H(9)       | 119.5      | C(9)-C(10)-C(5)       | 118.72(10) |

|                      |           |                     |            |
|----------------------|-----------|---------------------|------------|
| C(9)-C(10)-C(1)      | 121.73(9) | C(5)-C(10)-C(1)     | 119.54(10) |
| O(2)-C(11)-C(12)#4   | 110.59(8) | O(2)-C(11)-H(11A)   | 109.5      |
| C(12)#4-C(11)-H(11A) | 109.5     | O(2)-C(11)-H(11B)   | 109.5      |
| C(12)#4-C(11)-H(11B) | 109.5     | H(11A)-C(11)-H(11B) | 108.1      |
| O(2)-C(12)-C(11)#4   | 110.58(7) | O(2)-C(12)-H(12A)   | 109.5      |
| C(11)#4-C(12)-H(12A) | 109.5     | O(2)-C(12)-H(12B)   | 109.5      |
| C(11)#4-C(12)-H(12B) | 109.5     | H(12A)-C(12)-H(12B) | 108.1      |

---

Symmetry transformations used to generate equivalent atoms:

#1  $y-1/4, -x+5/4, -z+1/4$  #2  $-x+1, -y+3/2, z+0$  #3  $-y+5/4, x+1/4, -z+1/4$   
#4  $-x+1, -y+1, -z$

**Powder diffraction patterns for  $[(\text{PhOLi})_4 \cdot 3\text{Dioxane}]_\infty$ , 1**

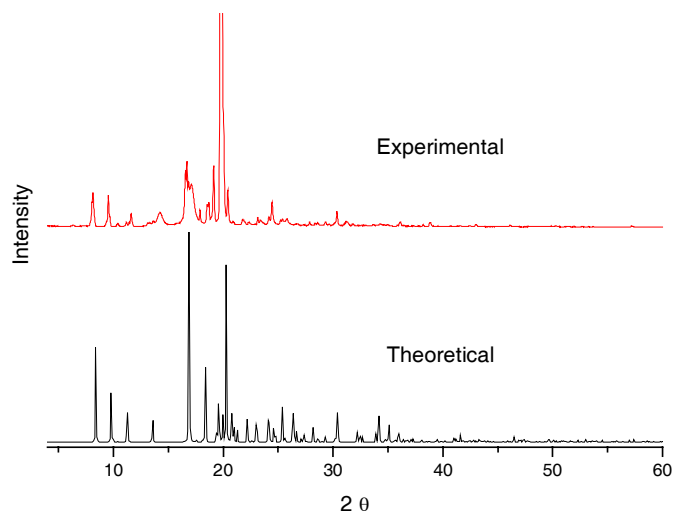

**Powder diffraction patterns for  $[\{(4\text{-Et-C}_6\text{H}_4\text{OLi})_4 \cdot 5/2\text{Dioxane}\} \cdot \text{Dioxane}]_\infty$ , 2**

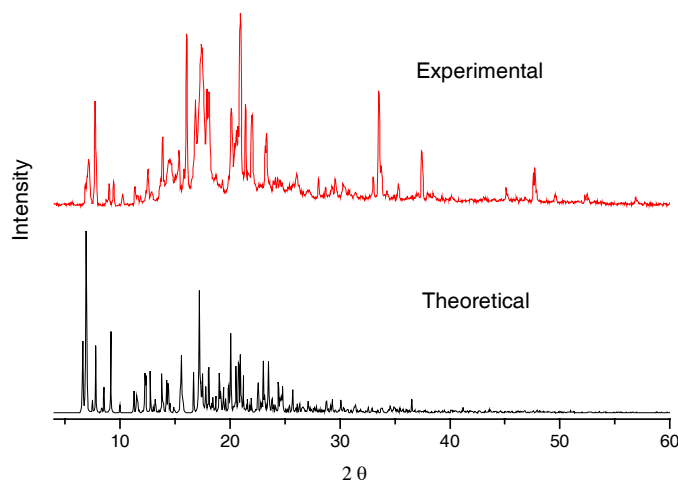

# Powder diffraction patterns for $\{[(C_{10}H_7OLi)_4 \cdot 2Dioxane] \cdot 3Dioxane\}_n$ , 3

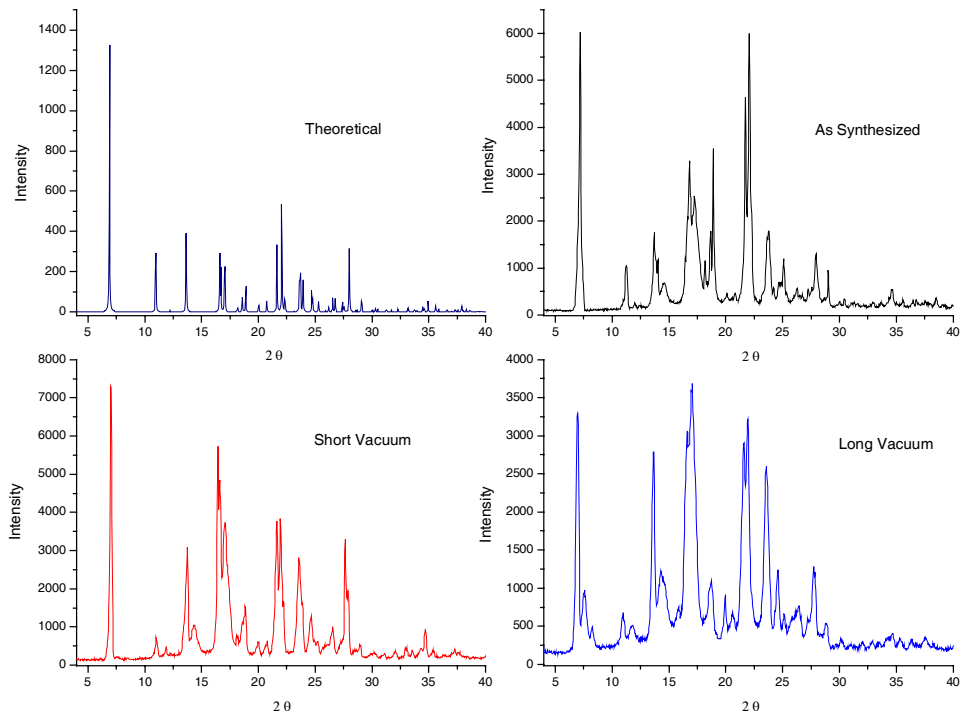

## Calculations

Tables of atomic coordinates and associated energies for the calculated geometries of [(PhOLi)<sub>4</sub>·4Dioxane] (**I**), [{(PhOLi)<sub>4</sub>]<sub>2</sub>·7Dioxane] (**II**), and 1,4-dioxane (**III**) are provided. Geometry optimizations were performed at the HF/6-31G\* level and single point energies recalculated at the B3LYP/6311G\*\* level.

### [(PhOLi)<sub>4</sub>·4Dioxane] (**I**)

Optimization HF/6-31G\* : -4641.2757 h

Single Point B3LYP/6-311G\*\* : -4671.0704 h

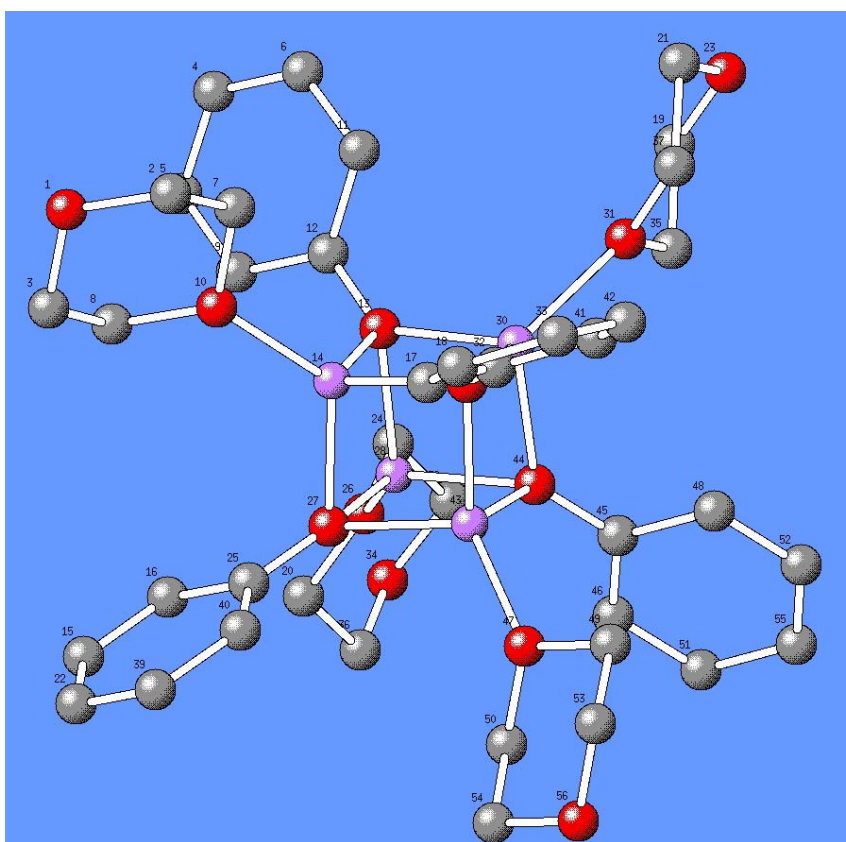

| Center Number | Atomic Number | Atomic Type | Coordinates (Angstroms) |           |           |
|---------------|---------------|-------------|-------------------------|-----------|-----------|
|               |               |             | X                       | Y         | Z         |
| 1             | 8             | 0           | -3.617329               | -5.176931 | 0.330208  |
| 2             | 6             | 0           | -3.293324               | -4.545783 | -0.877871 |
| 3             | 6             | 0           | -3.624156               | -4.282027 | 1.408674  |
| 4             | 6             | 0           | 2.674432                | -5.148334 | 1.010944  |
| 5             | 6             | 0           | 2.217223                | -4.340862 | 2.041396  |
| 6             | 6             | 0           | 2.573427                | -4.677130 | -0.289056 |
| 7             | 6             | 0           | -1.942542               | -3.864804 | -0.774445 |

|    |   |   |           |           |           |
|----|---|---|-----------|-----------|-----------|
| 8  | 6 | 0 | -2.275752 | -3.602517 | 1.540166  |
| 9  | 6 | 0 | 1.676185  | -3.092596 | 1.784729  |
| 10 | 8 | 0 | -1.947599 | -2.962733 | 0.318402  |
| 11 | 6 | 0 | 2.034263  | -3.430555 | -0.558013 |
| 12 | 6 | 0 | 1.575172  | -2.600489 | 0.474531  |
| 13 | 8 | 0 | 1.055604  | -1.415511 | 0.226321  |
| 14 | 3 | 0 | -0.904531 | -1.277826 | 0.182707  |
| 15 | 6 | 0 | -2.499986 | -0.327962 | 4.725180  |
| 16 | 6 | 0 | -1.558589 | -0.285129 | 3.709848  |
| 17 | 6 | 0 | -3.219768 | -0.581123 | -2.220910 |
| 18 | 6 | 0 | -4.151047 | -0.531354 | -3.243581 |
| 19 | 6 | 0 | 4.652286  | -1.009287 | -2.928798 |
| 20 | 6 | 0 | 2.144010  | 0.833269  | 4.133063  |
| 21 | 6 | 0 | 3.191465  | -1.862922 | -4.521089 |
| 22 | 6 | 0 | -3.804797 | 0.085130  | 4.507740  |
| 23 | 8 | 0 | 4.476338  | -1.366569 | -4.273342 |
| 24 | 6 | 0 | 3.630730  | -0.044617 | 2.532501  |
| 25 | 6 | 0 | -1.891624 | 0.182567  | 2.430416  |
| 26 | 8 | 0 | 2.323233  | 0.440739  | 2.786150  |
| 27 | 8 | 0 | -1.001633 | 0.220924  | 1.459666  |
| 28 | 3 | 0 | 0.954027  | 0.215988  | 1.309573  |
| 29 | 8 | 0 | -1.001611 | -0.219418 | -1.459992 |
| 30 | 3 | 0 | 0.954002  | -0.217336 | -1.309325 |
| 31 | 8 | 0 | 2.323560  | -0.444550 | -2.785287 |
| 32 | 6 | 0 | -1.891418 | -0.179592 | -2.430853 |
| 33 | 6 | 0 | -3.804188 | -0.078978 | -4.508392 |
| 34 | 8 | 0 | 4.477100  | 1.359657  | 4.274558  |
| 35 | 6 | 0 | 3.631789  | 0.038495  | -2.531031 |
| 36 | 6 | 0 | 3.192994  | 1.858272  | 4.521721  |
| 37 | 6 | 0 | 2.144086  | -0.836294 | -4.132387 |
| 38 | 6 | 0 | 4.652873  | 1.001585  | 2.930207  |
| 39 | 6 | 0 | -4.150709 | 0.538266  | 3.242942  |
| 40 | 6 | 0 | -3.219233 | 0.586489  | 2.220377  |
| 41 | 6 | 0 | -1.557408 | 0.287359  | -3.710300 |
| 42 | 6 | 0 | -2.498617 | 0.331757  | -4.725738 |
| 43 | 3 | 0 | -0.902629 | 1.279157  | -0.183017 |
| 44 | 8 | 0 | 1.057584  | 1.414082  | -0.226066 |
| 45 | 6 | 0 | 1.579517  | 2.597996  | -0.474378 |
| 46 | 6 | 0 | 2.040302  | 3.427218  | 0.558083  |
| 47 | 8 | 0 | -1.942976 | 2.965797  | -0.318921 |
| 48 | 6 | 0 | 1.681466  | 3.089805  | -1.784621 |
| 49 | 6 | 0 | -2.270014 | 3.606076  | -1.540720 |
| 50 | 6 | 0 | -1.936316 | 3.867927  | 0.773865  |
| 51 | 6 | 0 | 2.581973  | 4.672684  | 0.289009  |
| 52 | 6 | 0 | 2.225011  | 4.336954  | -2.041404 |
| 53 | 6 | 0 | -3.617223 | 4.287960  | -1.409262 |
| 54 | 6 | 0 | -3.285896 | 4.551292  | 0.877263  |
| 55 | 6 | 0 | 2.683890  | 5.143579  | -1.011028 |
| 56 | 8 | 0 | -3.608808 | 5.182923  | -0.330857 |
| 57 | 1 | 0 | -3.275871 | -5.309673 | -1.644214 |
| 58 | 1 | 0 | -4.056590 | -3.813990 | -1.134972 |
| 59 | 1 | 0 | -3.850111 | -4.854443 | 2.298726  |
| 60 | 1 | 0 | -4.402772 | -3.533960 | 1.270135  |
| 61 | 1 | 0 | 3.093868  | -6.116850 | 1.214822  |
| 62 | 1 | 0 | 2.279150  | -4.686476 | 3.059480  |
| 63 | 1 | 0 | 2.916760  | -5.288012 | -1.106888 |

|     |   |   |           |           |           |
|-----|---|---|-----------|-----------|-----------|
| 64  | 1 | 0 | -1.155196 | -4.596326 | -0.625339 |
| 65  | 1 | 0 | -1.728866 | -3.286157 | -1.661381 |
| 66  | 1 | 0 | -1.504303 | -4.328541 | 1.775717  |
| 67  | 1 | 0 | -2.293406 | -2.839782 | 2.304089  |
| 68  | 1 | 0 | 1.318535  | -2.479742 | 2.594131  |
| 69  | 1 | 0 | 1.955259  | -3.078496 | -1.570775 |
| 70  | 1 | 0 | -2.208724 | -0.692769 | 5.695656  |
| 71  | 1 | 0 | -0.553661 | -0.625962 | 3.888348  |
| 72  | 1 | 0 | -3.504768 | -0.927598 | -1.242891 |
| 73  | 1 | 0 | -5.161518 | -0.847769 | -3.047635 |
| 74  | 1 | 0 | 4.555348  | -1.885763 | -2.291980 |
| 75  | 1 | 0 | 5.656161  | -0.617458 | -2.831137 |
| 76  | 1 | 0 | 2.224024  | -0.042170 | 4.771800  |
| 77  | 1 | 0 | 1.146456  | 1.239563  | 4.216611  |
| 78  | 1 | 0 | 3.033092  | -2.785292 | -3.965818 |
| 79  | 1 | 0 | 3.129739  | -2.083555 | -5.578712 |
| 80  | 1 | 0 | -4.532356 | 0.050786  | 5.298303  |
| 81  | 1 | 0 | 3.785596  | -0.958879 | 3.095569  |
| 82  | 1 | 0 | 3.682255  | -0.273046 | 1.478112  |
| 83  | 1 | 0 | -4.531597 | -0.043428 | -5.299039 |
| 84  | 1 | 0 | 3.683362  | 0.266410  | -1.476532 |
| 85  | 1 | 0 | 3.788385  | 0.952718  | -3.093680 |
| 86  | 1 | 0 | 3.131300  | 2.079391  | 5.579245  |
| 87  | 1 | 0 | 3.036354  | 2.780710  | 3.966070  |
| 88  | 1 | 0 | 1.145886  | -1.240914 | -4.216372 |
| 89  | 1 | 0 | 2.225738  | 0.039234  | -4.770795 |
| 90  | 1 | 0 | 5.656113  | 0.608015  | 2.833002  |
| 91  | 1 | 0 | 4.557626  | 1.877986  | 2.293032  |
| 92  | 1 | 0 | -5.160593 | 0.856504  | 3.046922  |
| 93  | 1 | 0 | -3.503509 | 0.933581  | 1.242368  |
| 94  | 1 | 0 | -0.551855 | 0.626378  | -3.888733 |
| 95  | 1 | 0 | -2.206598 | 0.695929  | -5.696224 |
| 96  | 1 | 0 | 1.960600  | 3.075409  | 1.570875  |
| 97  | 1 | 0 | 1.322540  | 2.477616  | -2.593963 |
| 98  | 1 | 0 | -2.288998 | 2.843327  | -2.304599 |
| 99  | 1 | 0 | -1.497300 | 4.330741  | -1.776319 |
| 100 | 1 | 0 | -1.723649 | 3.288962  | 1.660836  |
| 101 | 1 | 0 | -1.147683 | 4.598052  | 0.624706  |
| 102 | 1 | 0 | 2.926558  | 5.282938  | 1.106784  |
| 103 | 1 | 0 | 2.287589  | 4.682370  | -3.059515 |
| 104 | 1 | 0 | -4.397149 | 3.541270  | -1.270660 |
| 105 | 1 | 0 | -3.842185 | 4.860712  | -2.299349 |
| 106 | 1 | 0 | -4.050445 | 3.820863  | 1.134428  |
| 107 | 1 | 0 | -3.267086 | 5.315206  | 1.643550  |
| 108 | 1 | 0 | 3.105272  | 6.111230  | -1.214995 |

---



# $\{(\text{PhOLi})_4\}_2 \cdot 7\text{Dioxane}$ (II)

Optimization HF/6-31G\* : -2473.5505 h

Single Point B3LYP/6-311G\*\* : -2489.4056 h

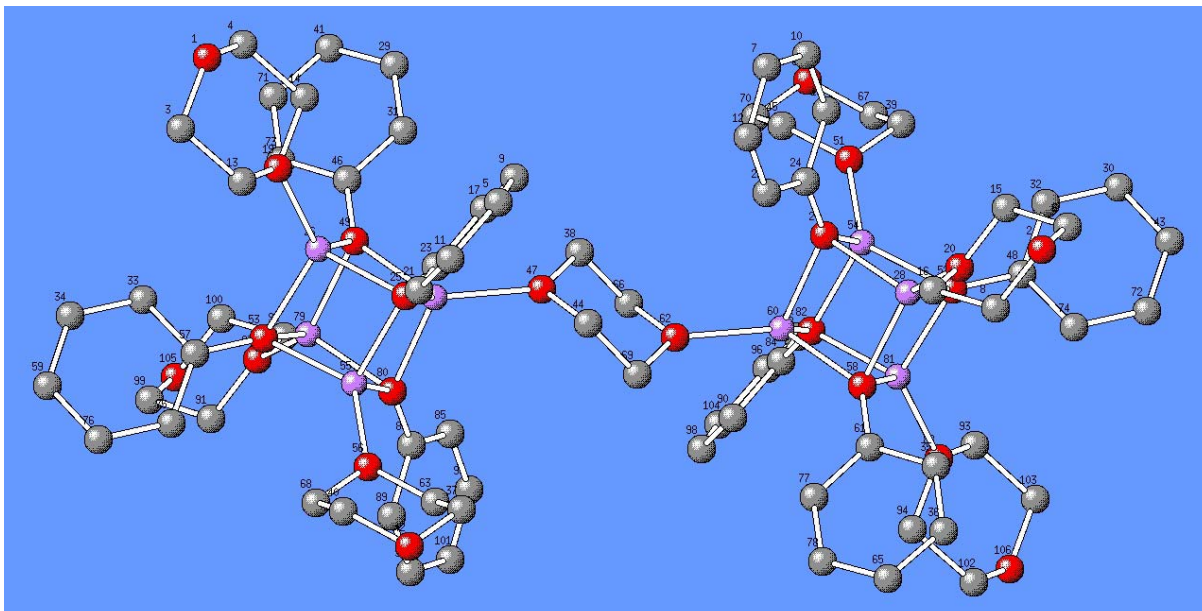

| Center Number | Atomic Number | Atomic Type | Coordinates (Angstroms) |          |           |
|---------------|---------------|-------------|-------------------------|----------|-----------|
|               |               |             | X                       | Y        | Z         |
| 1             | 8             | 0           | -8.383373               | 3.610841 | -3.719346 |
| 2             | 8             | 0           | 6.841657                | 6.000192 | 0.399665  |
| 3             | 6             | 0           | -8.850182               | 3.194014 | -2.466345 |
| 4             | 6             | 0           | -7.450689               | 2.715570 | -4.260995 |
| 5             | 6             | 0           | -3.468667               | 5.684131 | -0.387732 |
| 6             | 6             | 0           | 7.604123                | 5.077945 | -0.330191 |
| 7             | 6             | 0           | 2.284196                | 3.919257 | -3.676189 |
| 8             | 6             | 0           | 6.052188                | 5.378088 | 1.375323  |
| 9             | 6             | 0           | -2.876163               | 4.702783 | -1.167972 |
| 10            | 6             | 0           | 3.271552                | 3.086602 | -4.180541 |
| 11            | 6             | 0           | -4.351337               | 5.291113 | 0.606643  |
| 12            | 6             | 0           | 1.884024                | 3.744241 | -2.360018 |
| 13            | 6             | 0           | -7.693773               | 3.018993 | -1.501285 |
| 14            | 6             | 0           | -6.277600               | 2.539281 | -3.317769 |
| 15            | 6             | 0           | 6.704557                | 4.049790 | -0.986857 |
| 16            | 6             | 0           | 5.135582                | 4.351741 | 0.738863  |
| 17            | 6             | 0           | -3.150952               | 3.361666 | -0.960493 |
| 18            | 6             | 0           | 3.842201                | 2.097135 | -3.398050 |
| 19            | 8             | 0           | -6.750520               | 2.115024 | -2.049685 |
| 20            | 8             | 0           | 5.906542                | 3.419488 | 0.001212  |
| 21            | 6             | 0           | -4.634414               | 3.953017 | 0.823143  |
| 22            | 6             | 0           | 2.447564                | 2.757874 | -1.568461 |
| 23            | 6             | 0           | -4.035653               | 2.949970 | 0.047558  |
| 24            | 6             | 0           | 3.438235                | 1.899778 | -2.069594 |

|    |   |   |            |           |           |
|----|---|---|------------|-----------|-----------|
| 25 | 8 | 0 | -4.304512  | 1.674874  | 0.245025  |
| 26 | 3 | 0 | -5.737788  | 0.891229  | -0.857157 |
| 27 | 8 | 0 | 3.977399   | 0.962462  | -1.318089 |
| 28 | 3 | 0 | 5.401970   | 1.499854  | -0.071178 |
| 29 | 6 | 0 | -3.650225  | -0.831012 | -4.992659 |
| 30 | 6 | 0 | 9.678396   | 0.936236  | -2.373789 |
| 31 | 6 | 0 | -3.627360  | -0.512102 | -3.644910 |
| 32 | 6 | 0 | 8.347959   | 0.635718  | -2.131436 |
| 33 | 6 | 0 | -8.842092  | -0.370224 | -0.195806 |
| 34 | 6 | 0 | -10.168130 | -0.673796 | 0.059222  |
| 35 | 6 | 0 | 5.710533   | 1.659990  | 3.348058  |
| 36 | 6 | 0 | 5.721703   | 1.973436  | 4.696275  |
| 37 | 6 | 0 | -3.790076  | 2.960659  | 4.773361  |
| 38 | 6 | 0 | -0.400796  | -0.360678 | -1.289081 |
| 39 | 6 | 0 | 6.263001   | -1.750741 | -4.335440 |
| 40 | 6 | 0 | -6.101491  | 3.138810  | 4.917843  |
| 41 | 6 | 0 | -4.692957  | -1.564828 | -5.535960 |
| 42 | 8 | 0 | -4.884990  | 3.244641  | 5.601800  |
| 43 | 6 | 0 | 10.605624  | 0.954301  | -1.344130 |
| 44 | 6 | 0 | -0.689489  | 1.094198  | 0.531287  |
| 45 | 6 | 0 | 3.919450   | -1.563135 | -4.204563 |
| 46 | 6 | 0 | -4.654962  | -0.924674 | -2.784695 |
| 47 | 8 | 0 | -1.318855  | 0.214126  | -0.379929 |
| 48 | 6 | 0 | 7.895669   | 0.333378  | -0.838735 |
| 49 | 8 | 0 | -4.642355  | -0.619575 | -1.502921 |
| 50 | 3 | 0 | -3.329511  | 0.047059  | -0.221703 |
| 51 | 8 | 0 | 5.152179   | -1.430414 | -3.519052 |
| 52 | 8 | 0 | 6.630790   | 0.049441  | -0.603170 |
| 53 | 8 | 0 | -6.630600  | -0.050578 | 0.603571  |
| 54 | 3 | 0 | 5.111412   | -0.600477 | -1.660661 |
| 55 | 3 | 0 | -5.111266  | 0.599243  | 1.661190  |
| 56 | 8 | 0 | -5.151695  | 1.427766  | 3.520238  |
| 57 | 6 | 0 | -7.895255  | -0.335389 | 0.839287  |
| 58 | 8 | 0 | 4.642284   | 0.621314  | 1.502274  |
| 59 | 6 | 0 | -10.604722 | -0.958181 | 1.345000  |
| 60 | 3 | 0 | 3.329425   | -0.045681 | 0.221278  |
| 61 | 6 | 0 | 4.654788   | 0.927534  | 2.783782  |
| 62 | 8 | 0 | 1.318651   | -0.211549 | 0.378939  |
| 63 | 6 | 0 | -3.918629  | 1.561084  | 4.205027  |
| 64 | 8 | 0 | 4.885154   | -3.248781 | -5.599268 |
| 65 | 6 | 0 | 4.692551   | 1.570097  | 5.534490  |
| 66 | 6 | 0 | 0.689293   | -1.091637 | -0.532275 |
| 67 | 6 | 0 | 6.101305   | -3.143511 | -4.914600 |
| 68 | 6 | 0 | -6.262272  | 1.746373  | 4.337632  |
| 69 | 6 | 0 | 0.400590   | 0.363228  | 1.288095  |
| 70 | 6 | 0 | 3.789960   | -2.963071 | -4.771795 |
| 71 | 6 | 0 | -5.721874  | -1.969190 | -4.697948 |
| 72 | 6 | 0 | 10.168483  | 0.671231  | -0.058249 |
| 73 | 6 | 0 | -5.710588  | -1.656927 | -3.349456 |
| 74 | 6 | 0 | 8.842204   | 0.368580  | 0.196622  |
| 75 | 6 | 0 | -8.346982  | -0.639061 | 2.131873  |
| 76 | 6 | 0 | -9.677184  | -0.940490 | 2.374386  |
| 77 | 6 | 0 | 3.626949   | 0.515997  | 3.644209  |
| 78 | 6 | 0 | 3.649702   | 0.836086  | 4.991682  |
| 79 | 3 | 0 | -5.401164  | -1.499881 | 0.069955  |
| 80 | 8 | 0 | -3.976548  | -0.962801 | 1.316939  |

|     |   |   |           |           |           |
|-----|---|---|-----------|-----------|-----------|
| 81  | 3 | 0 | 5.737050  | -0.890657 | 0.858099  |
| 82  | 8 | 0 | 4.303663  | -1.674436 | -0.243810 |
| 83  | 6 | 0 | -3.436554 | -1.900510 | 2.067355  |
| 84  | 6 | 0 | 4.033850  | -2.949175 | -0.045346 |
| 85  | 6 | 0 | -2.446177 | -2.758097 | 1.564770  |
| 86  | 6 | 0 | 4.631982  | -3.953288 | -0.820037 |
| 87  | 8 | 0 | -5.904904 | -3.419679 | -0.003913 |
| 88  | 8 | 0 | 6.748840  | -2.114053 | 2.051832  |
| 89  | 6 | 0 | -3.839294 | -2.098817 | 3.396039  |
| 90  | 6 | 0 | 3.148713  | -3.359409 | 0.962918  |
| 91  | 6 | 0 | -6.702082 | -4.051191 | 0.984060  |
| 92  | 6 | 0 | -5.134118 | -4.350976 | -0.742950 |
| 93  | 6 | 0 | 7.691605  | -3.019046 | 1.504283  |
| 94  | 6 | 0 | 6.275458  | -2.537015 | 3.320176  |
| 95  | 6 | 0 | -1.881734 | -3.744879 | 2.355165  |
| 96  | 6 | 0 | 4.347905  | -5.291003 | -0.602486 |
| 97  | 6 | 0 | -3.267754 | -3.088693 | 4.177365  |
| 98  | 6 | 0 | 2.872927  | -4.700158 | 1.171458  |
| 99  | 6 | 0 | -7.601744 | -5.078997 | 0.326977  |
| 100 | 6 | 0 | -6.050806 | -5.376994 | -1.379822 |
| 101 | 6 | 0 | -2.280692 | -3.920828 | 3.671582  |
| 102 | 6 | 0 | 7.448292  | -2.713312 | 4.263718  |
| 103 | 6 | 0 | 8.847755  | -3.194047 | 2.469658  |
| 104 | 6 | 0 | 3.464823  | -5.682571 | 0.392094  |
| 105 | 8 | 0 | -6.839455 | -6.000294 | -0.404264 |
| 106 | 8 | 0 | 8.380488  | -3.609600 | 3.722911  |
| 107 | 1 | 0 | -9.531874 | 3.954542  | -2.108510 |
| 108 | 1 | 0 | -9.395779 | 2.257129  | -2.562563 |
| 109 | 1 | 0 | -7.120861 | 3.128859  | -5.205014 |
| 110 | 1 | 0 | -7.921219 | 1.752208  | -4.449154 |
| 111 | 1 | 0 | -3.252334 | 6.724101  | -0.552512 |
| 112 | 1 | 0 | 8.152592  | 5.636047  | -1.077562 |
| 113 | 1 | 0 | 8.317194  | 4.579582  | 0.323894  |
| 114 | 1 | 0 | 1.844947  | 4.686116  | -4.288109 |
| 115 | 1 | 0 | 5.474839  | 6.152640  | 1.863011  |
| 116 | 1 | 0 | 6.684899  | 4.896962  | 2.118782  |
| 117 | 1 | 0 | -2.193352 | 4.982140  | -1.952501 |
| 118 | 1 | 0 | 3.606302  | 3.209536  | -5.196657 |
| 119 | 1 | 0 | -4.829294 | 6.034983  | 1.221537  |
| 120 | 1 | 0 | 1.127007  | 4.385260  | -1.940341 |
| 121 | 1 | 0 | -7.205047 | 3.969298  | -1.313779 |
| 122 | 1 | 0 | -8.027969 | 2.598448  | -0.563857 |
| 123 | 1 | 0 | -5.739945 | 3.474180  | -3.197861 |
| 124 | 1 | 0 | -5.598212 | 1.780104  | -3.674728 |
| 125 | 1 | 0 | 6.054086  | 4.521334  | -1.716724 |
| 126 | 1 | 0 | 7.283023  | 3.277003  | -1.469854 |
| 127 | 1 | 0 | 4.430194  | 4.833621  | 0.069833  |
| 128 | 1 | 0 | 4.593871  | 3.793769  | 1.488347  |
| 129 | 1 | 0 | -2.689252 | 2.612551  | -1.580158 |
| 130 | 1 | 0 | 4.615099  | 1.465583  | -3.799994 |
| 131 | 1 | 0 | -5.327331 | 3.660448  | 1.591556  |
| 132 | 1 | 0 | 2.139326  | 2.641798  | -0.544207 |
| 133 | 1 | 0 | -2.844796 | -0.496684 | -5.624381 |
| 134 | 1 | 0 | 9.990401  | 1.163125  | -3.379232 |
| 135 | 1 | 0 | -2.820914 | 0.075257  | -3.241224 |
| 136 | 1 | 0 | 7.634605  | 0.645931  | -2.937364 |

|     |   |   |            |           |           |
|-----|---|---|------------|-----------|-----------|
| 137 | 1 | 0 | -8.516020  | -0.160278 | -1.199548 |
| 138 | 1 | 0 | -10.868227 | -0.690986 | -0.758755 |
| 139 | 1 | 0 | 6.519754   | 1.971787  | 2.710517  |
| 140 | 1 | 0 | 6.547096   | 2.537585  | 5.096231  |
| 141 | 1 | 0 | -3.730002  | 3.687264  | 3.966816  |
| 142 | 1 | 0 | -2.899097  | 3.041842  | 5.382004  |
| 143 | 1 | 0 | 0.026811   | 0.422002  | -1.907530 |
| 144 | 1 | 0 | -0.956964  | -1.044366 | -1.914323 |
| 145 | 1 | 0 | 6.336492   | -1.020202 | -5.136590 |
| 146 | 1 | 0 | 7.144111   | -1.682438 | -3.714723 |
| 147 | 1 | 0 | -6.150520  | 3.881162  | 4.123727  |
| 148 | 1 | 0 | -6.890308  | 3.344274  | 5.629526  |
| 149 | 1 | 0 | -4.706673  | -1.810455 | -6.582360 |
| 150 | 1 | 0 | 11.637235  | 1.187625  | -1.535946 |
| 151 | 1 | 0 | -0.279313  | 1.935931  | -0.014158 |
| 152 | 1 | 0 | -1.453943  | 1.454249  | 1.203443  |
| 153 | 1 | 0 | 3.875310   | -0.828493 | -5.002257 |
| 154 | 1 | 0 | 3.137980   | -1.349139 | -3.490091 |
| 155 | 1 | 0 | -11.636148 | -1.192215 | 1.536939  |
| 156 | 1 | 0 | -3.137442  | 1.348444  | 3.489838  |
| 157 | 1 | 0 | -3.873246  | 0.825807  | 5.002067  |
| 158 | 1 | 0 | 4.706179   | 1.816642  | 6.580676  |
| 159 | 1 | 0 | 1.453753   | -1.451646 | -1.204449 |
| 160 | 1 | 0 | 0.279154   | -1.933372 | 0.013177  |
| 161 | 1 | 0 | 6.890397   | -3.350299 | -5.625595 |
| 162 | 1 | 0 | 6.149122   | -3.885251 | -4.119838 |
| 163 | 1 | 0 | -7.143729  | 1.677772  | 3.717441  |
| 164 | 1 | 0 | -6.334550  | 1.015097  | 5.138220  |
| 165 | 1 | 0 | 0.956745   | 1.046913  | 1.913351  |
| 166 | 1 | 0 | -0.027027  | -0.419467 | 1.906519  |
| 167 | 1 | 0 | 2.899307   | -3.043938 | -5.380958 |
| 168 | 1 | 0 | 3.728675   | -3.688934 | -3.964672 |
| 169 | 1 | 0 | -6.547170  | -2.533215 | -5.098278 |
| 170 | 1 | 0 | 10.868336  | 0.688736  | 0.759930  |
| 171 | 1 | 0 | -6.519628  | -1.969507 | -2.712068 |
| 172 | 1 | 0 | 8.515709   | 0.159650  | 1.200439  |
| 173 | 1 | 0 | -7.633371  | -0.649585 | 2.937569  |
| 174 | 1 | 0 | -9.988756  | -1.168394 | 3.379734  |
| 175 | 1 | 0 | 2.820411   | -0.071510 | 3.240924  |
| 176 | 1 | 0 | 2.844090   | 0.502529  | 5.623580  |
| 177 | 1 | 0 | -2.138896  | -2.641304 | 0.540308  |
| 178 | 1 | 0 | 5.325208   | -3.661846 | -1.588598 |
| 179 | 1 | 0 | -4.611954  | -1.467681 | 3.799089  |
| 180 | 1 | 0 | 2.687458   | -2.609460 | 1.581903  |
| 181 | 1 | 0 | -7.280488  | -3.279058 | 1.468173  |
| 182 | 1 | 0 | -6.050991  | -4.523230 | 1.713052  |
| 183 | 1 | 0 | -4.593052  | -3.792113 | -1.492235 |
| 184 | 1 | 0 | -4.428162  | -4.833284 | -0.074829 |
| 185 | 1 | 0 | 8.026213   | -2.599440 | 0.566581  |
| 186 | 1 | 0 | 7.202306   | -3.969187 | 1.317440  |
| 187 | 1 | 0 | 5.596500   | -1.777125 | 3.676435  |
| 188 | 1 | 0 | 5.737225   | -3.471665 | 3.200920  |
| 189 | 1 | 0 | -1.124969  | -4.385469 | 1.934382  |
| 190 | 1 | 0 | 4.825400   | -6.035719 | -1.216713 |
| 191 | 1 | 0 | -3.601569  | -3.212360 | 5.193699  |
| 192 | 1 | 0 | 2.189816   | -4.978370 | 1.956133  |

|     |   |   |           |           |           |
|-----|---|---|-----------|-----------|-----------|
| 193 | 1 | 0 | -8.315394 | -4.580227 | -0.326165 |
| 194 | 1 | 0 | -8.149553 | -5.637998 | 1.074160  |
| 195 | 1 | 0 | -6.684145 | -4.895347 | -2.122409 |
| 196 | 1 | 0 | -5.473524 | -6.150890 | -1.868631 |
| 197 | 1 | 0 | -1.840754 | -4.688006 | 4.282605  |
| 198 | 1 | 0 | 7.919408  | -1.750103 | 4.451196  |
| 199 | 1 | 0 | 7.118058  | -3.125653 | 5.208010  |
| 200 | 1 | 0 | 9.393930  | -2.257434 | 2.565228  |
| 201 | 1 | 0 | 9.529018  | -3.955287 | 2.112522  |
| 202 | 1 | 0 | 3.247719  | -6.722250 | 0.557694  |

---

### Dioxane (III)

Optimization HF/6-31G\* : -305.8253 h

Single Point B3LYP/6-311G\*\* : -307.74074 h

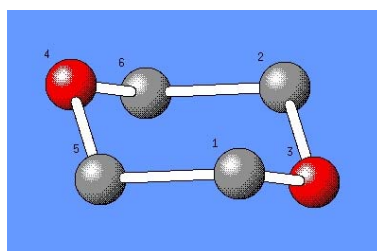


---

| Center Number | Atomic Number | Atomic Type | Coordinates (Angstroms) |           |           |
|---------------|---------------|-------------|-------------------------|-----------|-----------|
|               |               |             | X                       | Y         | Z         |
| 1             | 6             | 0           | -1.163875               | 0.734832  | -0.187585 |
| 2             | 6             | 0           | 1.162912                | 0.736247  | -0.187608 |
| 3             | 8             | 0           | -0.000864               | 1.355297  | 0.290141  |
| 4             | 8             | 0           | 0.000864                | -1.355297 | -0.290141 |
| 5             | 6             | 0           | -1.162912               | -0.736247 | 0.187608  |
| 6             | 6             | 0           | 1.163875                | -0.734831 | 0.187585  |
| 7             | 1             | 0           | -1.223379               | 0.838150  | -1.269983 |
| 8             | 1             | 0           | -2.005920               | 1.250570  | 0.255919  |
| 9             | 1             | 0           | 1.222295                | 0.839664  | -1.269989 |
| 10            | 1             | 0           | 2.004256                | 1.253003  | 0.255986  |
| 11            | 1             | 0           | -2.004256               | -1.253003 | -0.255986 |
| 12            | 1             | 0           | -1.222295               | -0.839664 | 1.269988  |
| 13            | 1             | 0           | 2.005920                | -1.250570 | -0.255917 |
| 14            | 1             | 0           | 1.223378                | -0.838149 | 1.269984  |

---
